# Supplementary material for: Synthesis of iminosugar derivatives presenting naphthyl and alkyl amine interacting groups and binding to somatostatin receptors
Source: Royal Society of Chemistry journal article supplement (doi:10.1039/c4md00074a), 2014-01-01

# **Synthesis of iminosugar derivatives presenting naphthyl and alkylamine interacting groups and binding to somatostatin receptors**

**Stephen Barron and Paul V. Murphy**

**$^1\text{H}$  and  $^{13}\text{C}$  NMR Spectra for Compounds 6 to 19**

**Log P calculation procedure is on final page of this supporting information document**

# **<sup>1</sup>H-NMR Compound 11**

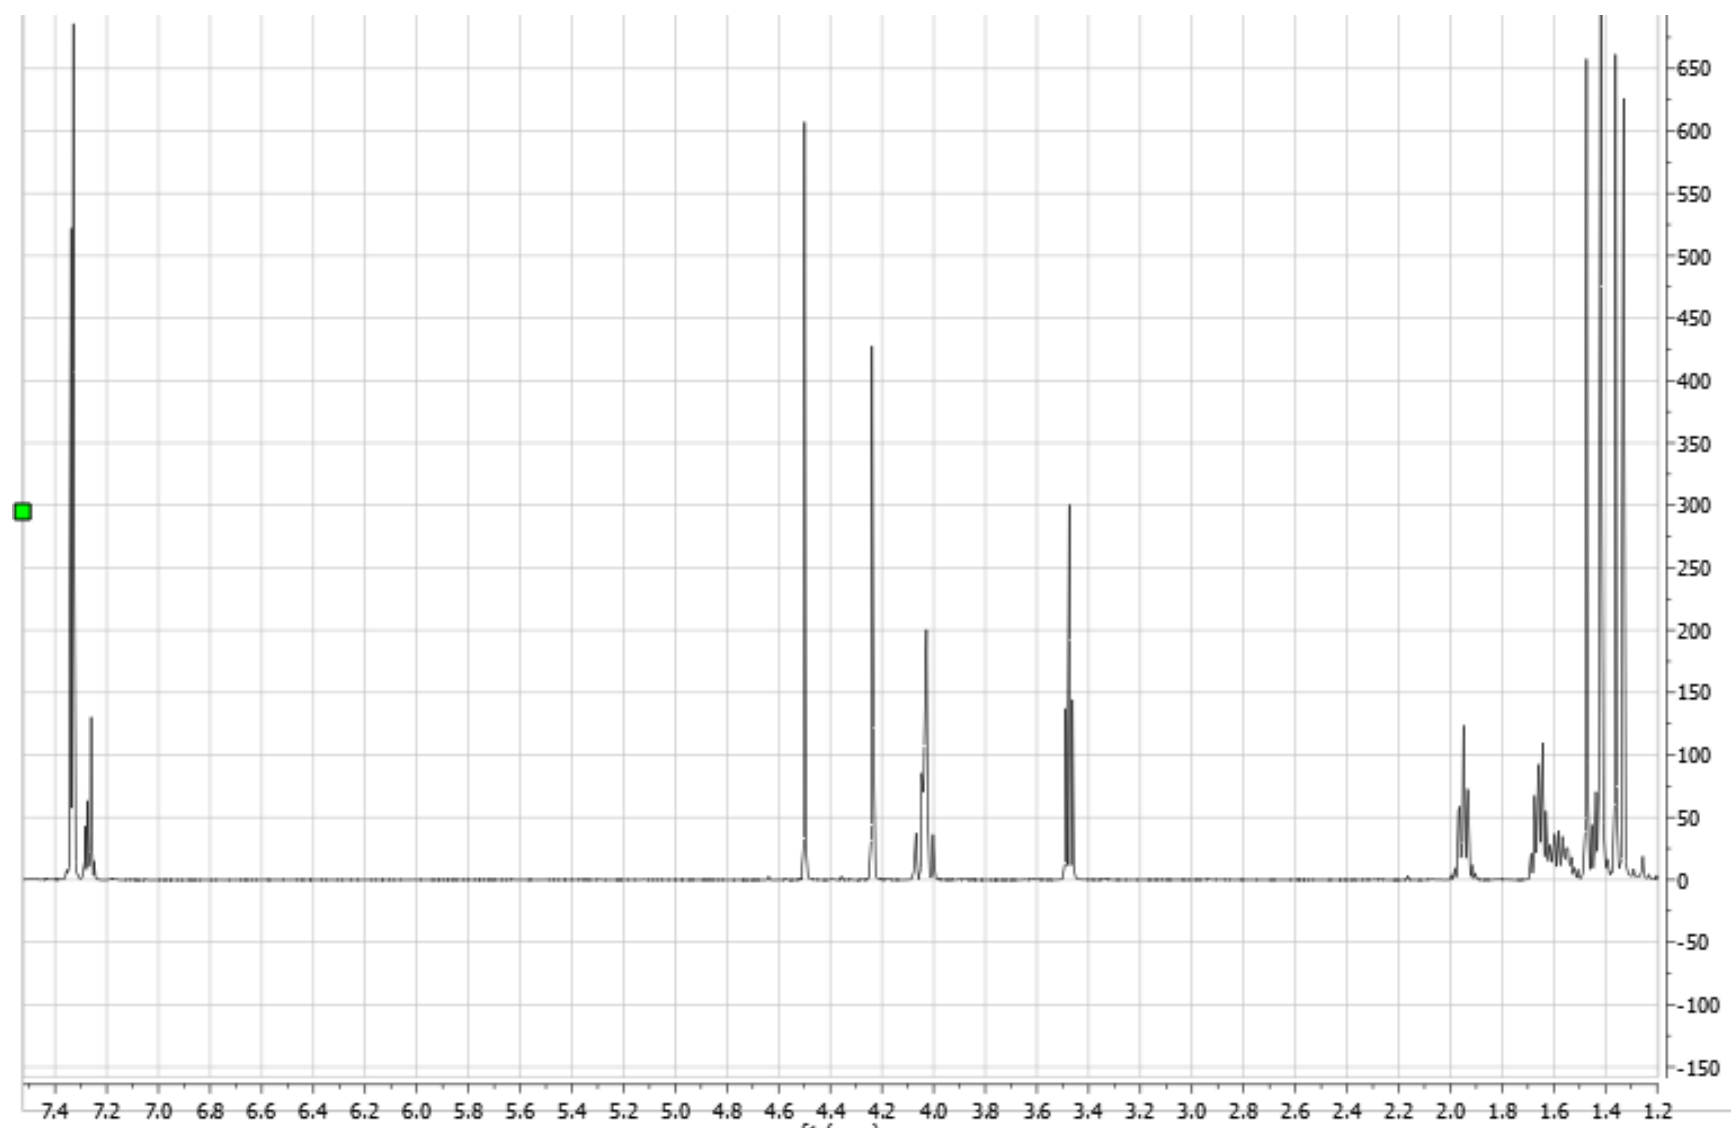

# **<sup>13</sup>C-NMR Compound 11**

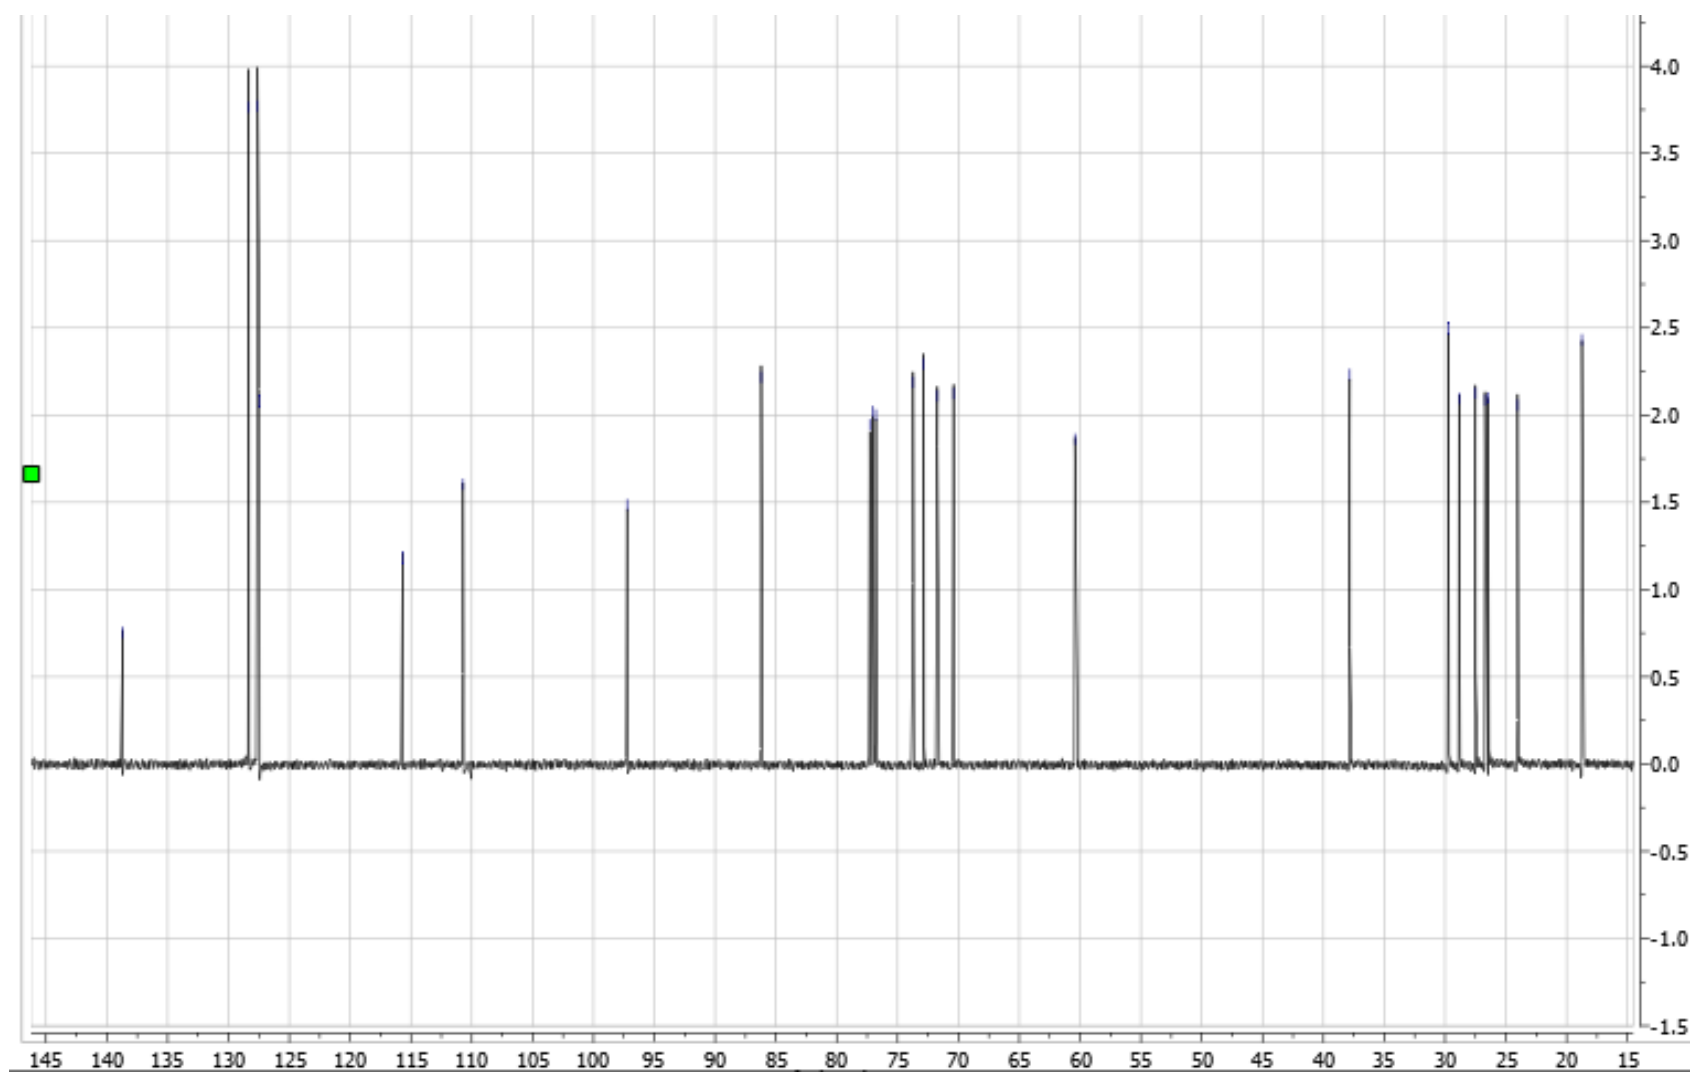

**<sup>1</sup>H-NMR Compound 12**

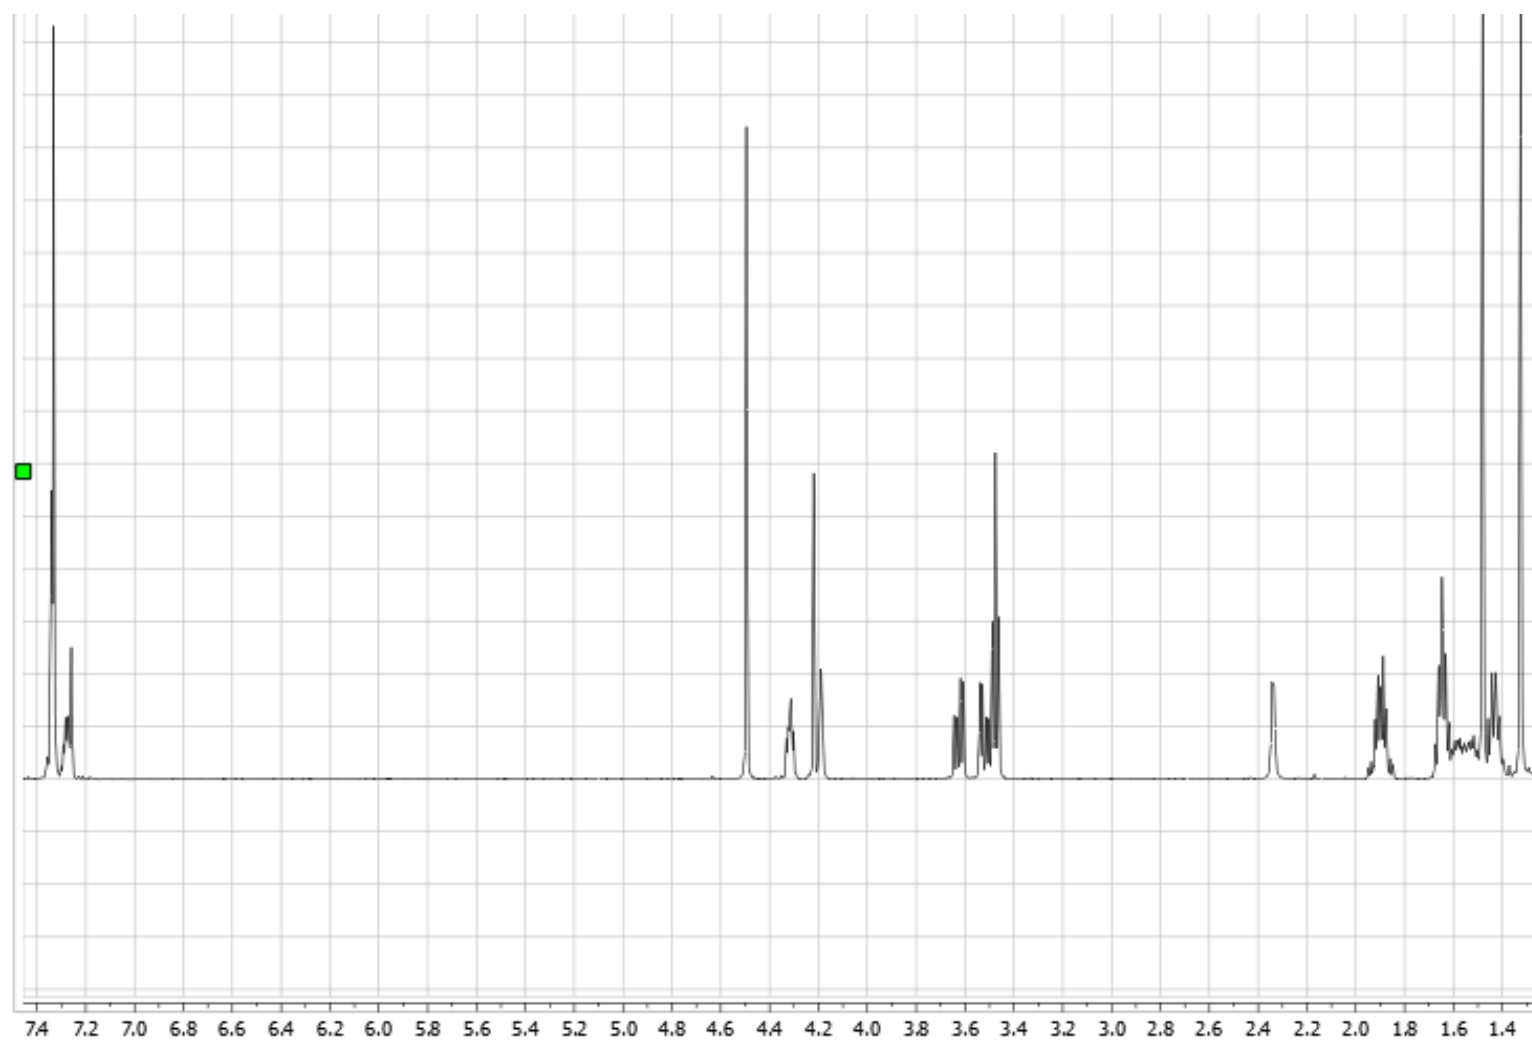

# **<sup>13</sup>C-NMR Compound 12**

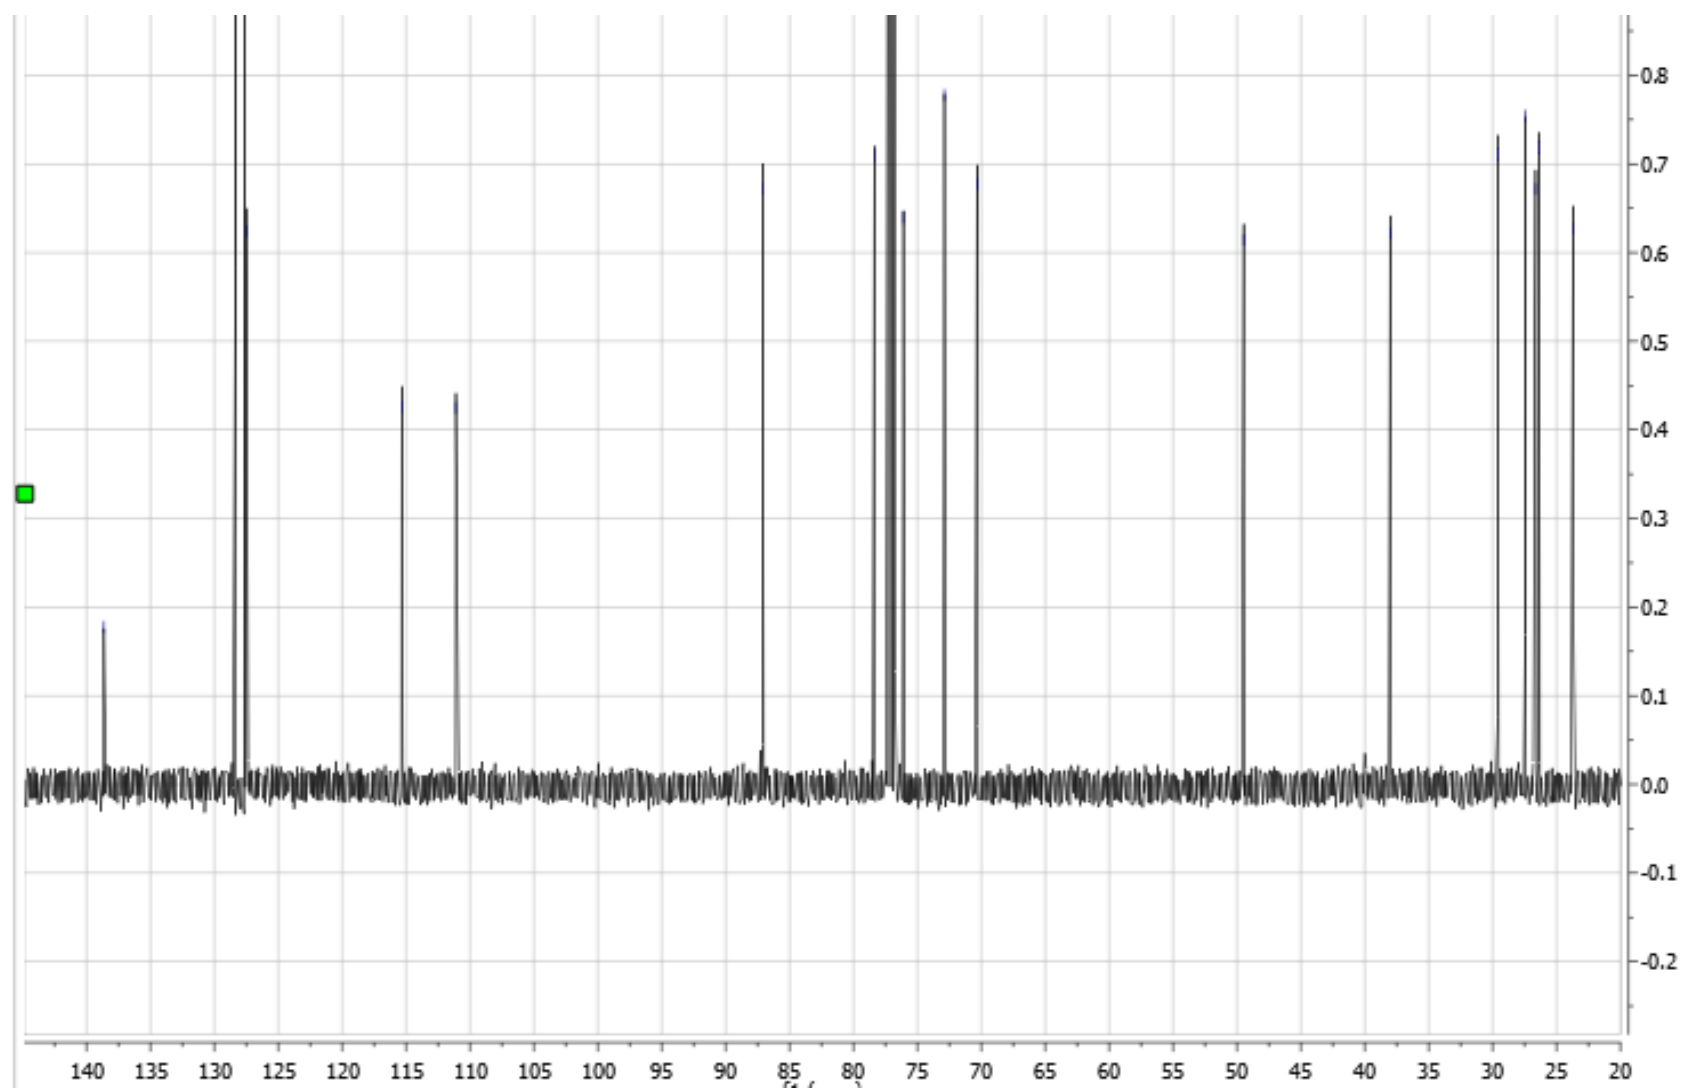

# **<sup>1</sup>H-NMR Compound 14**

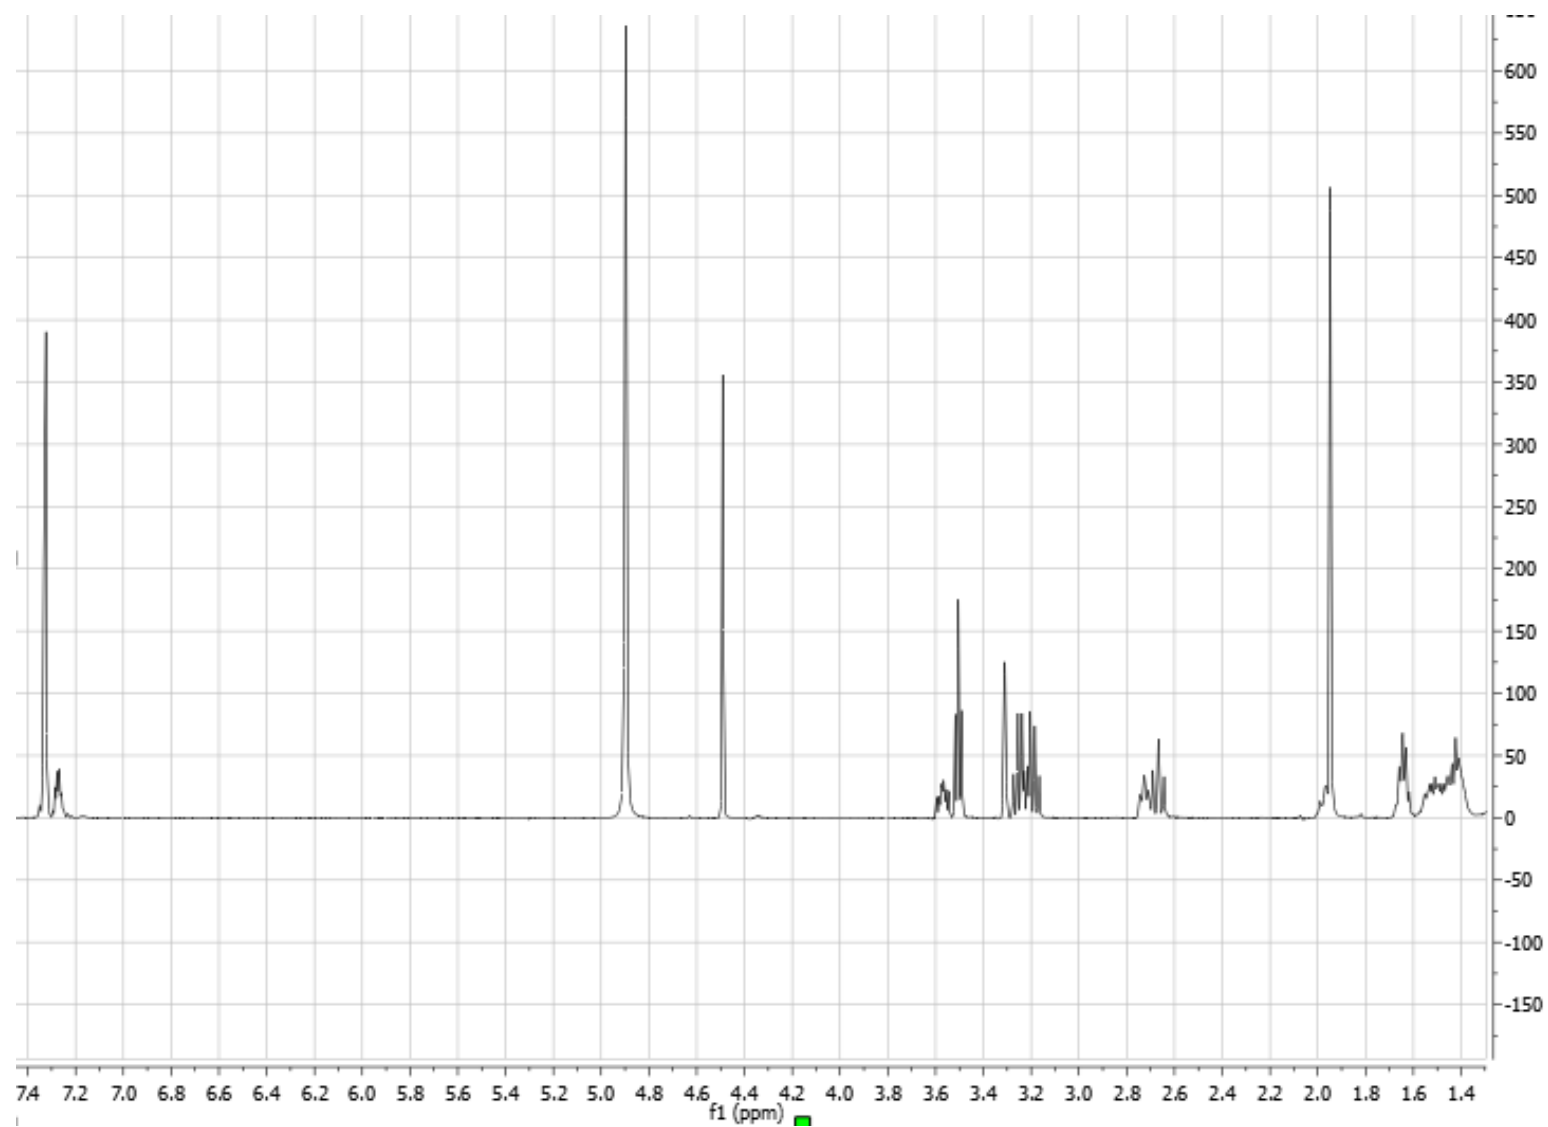

# **<sup>13</sup>C-NMR Compound 14**

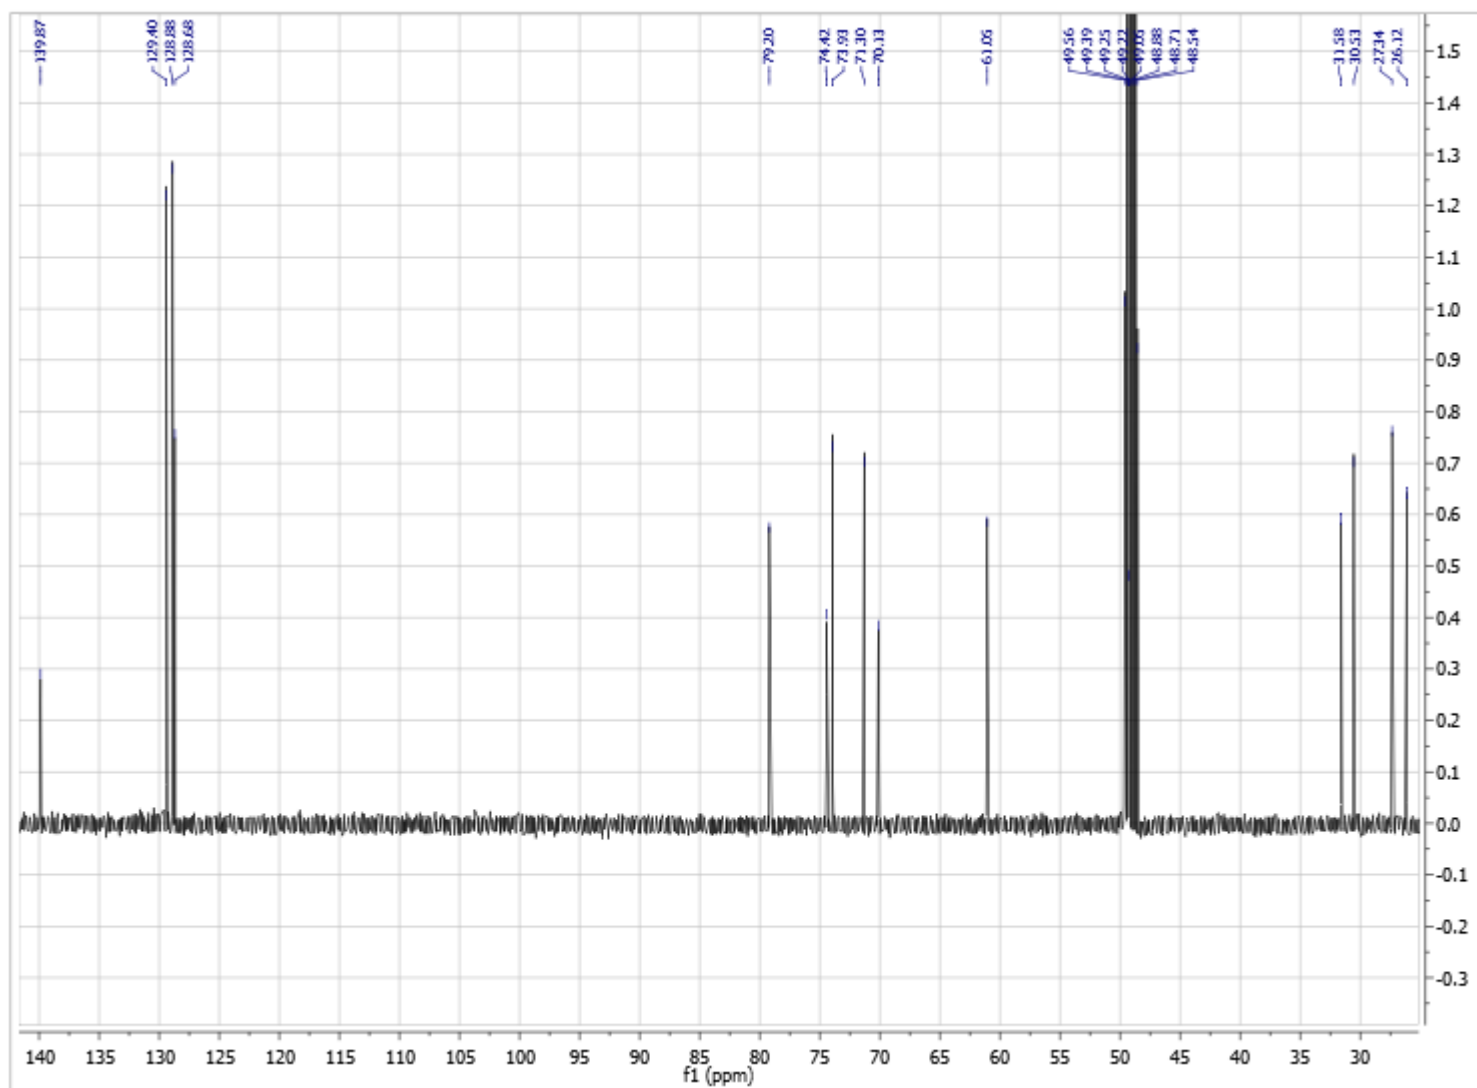

# **<sup>1</sup>H-NMR Compound 15**

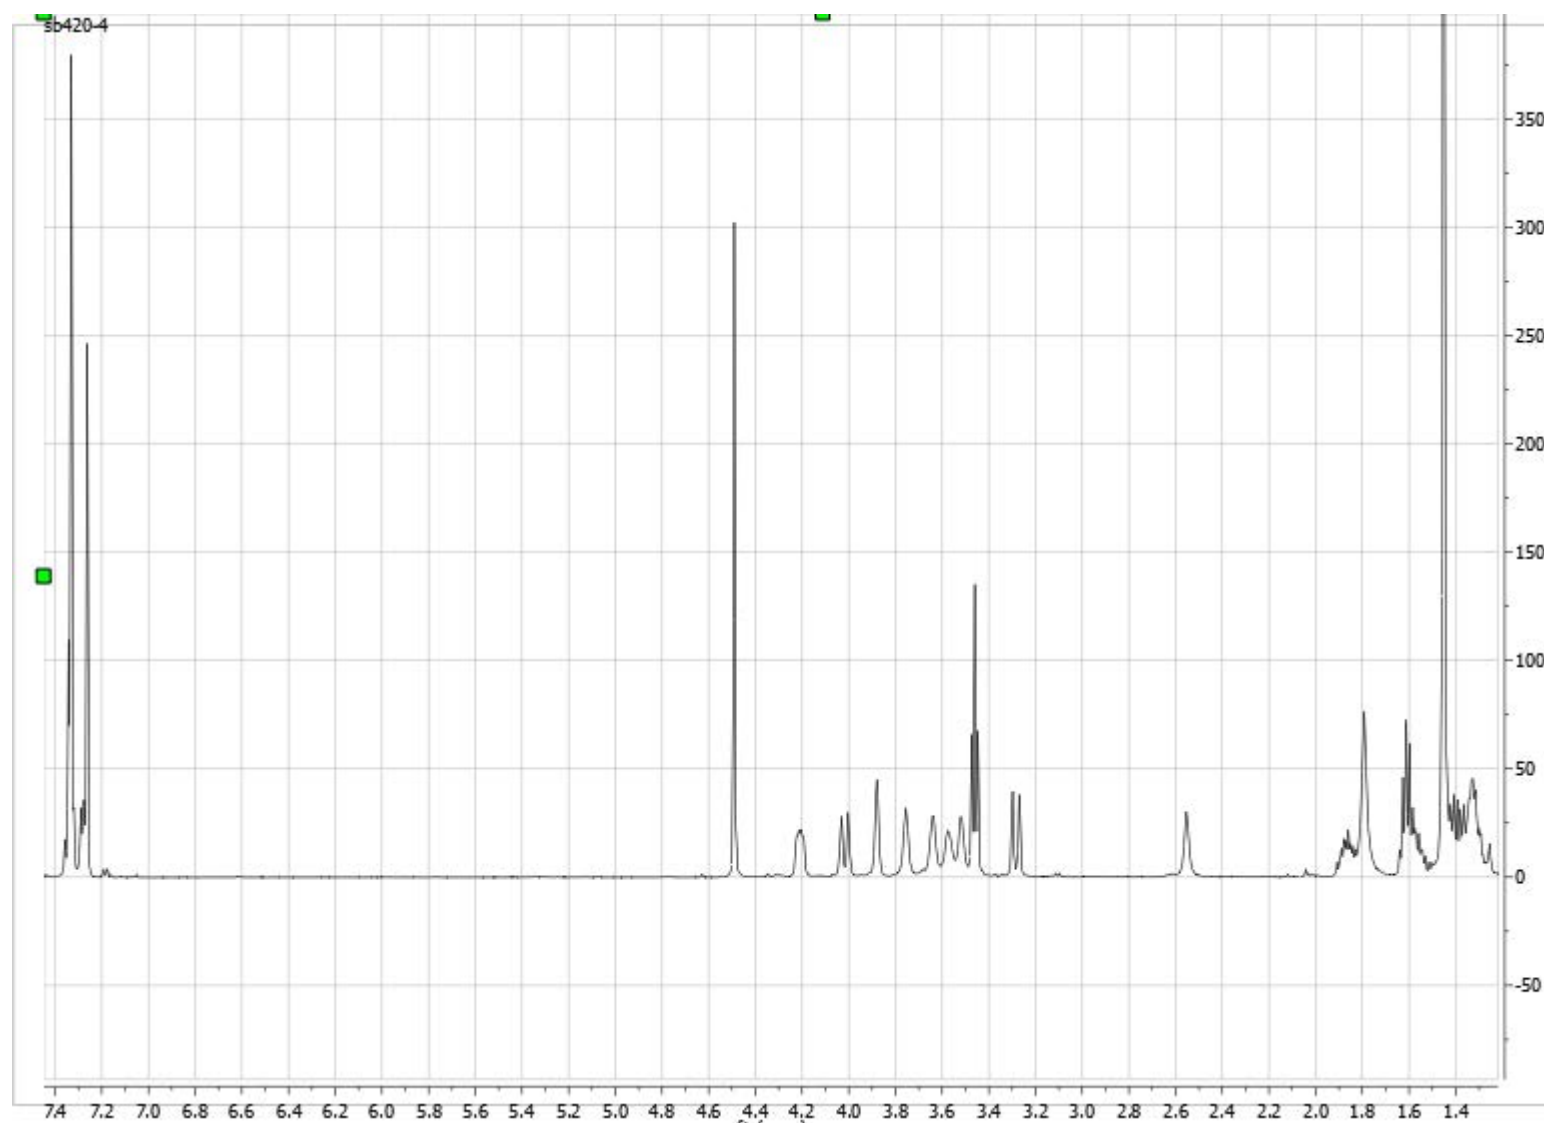



# **<sup>13</sup>C-NMR Compound 15**

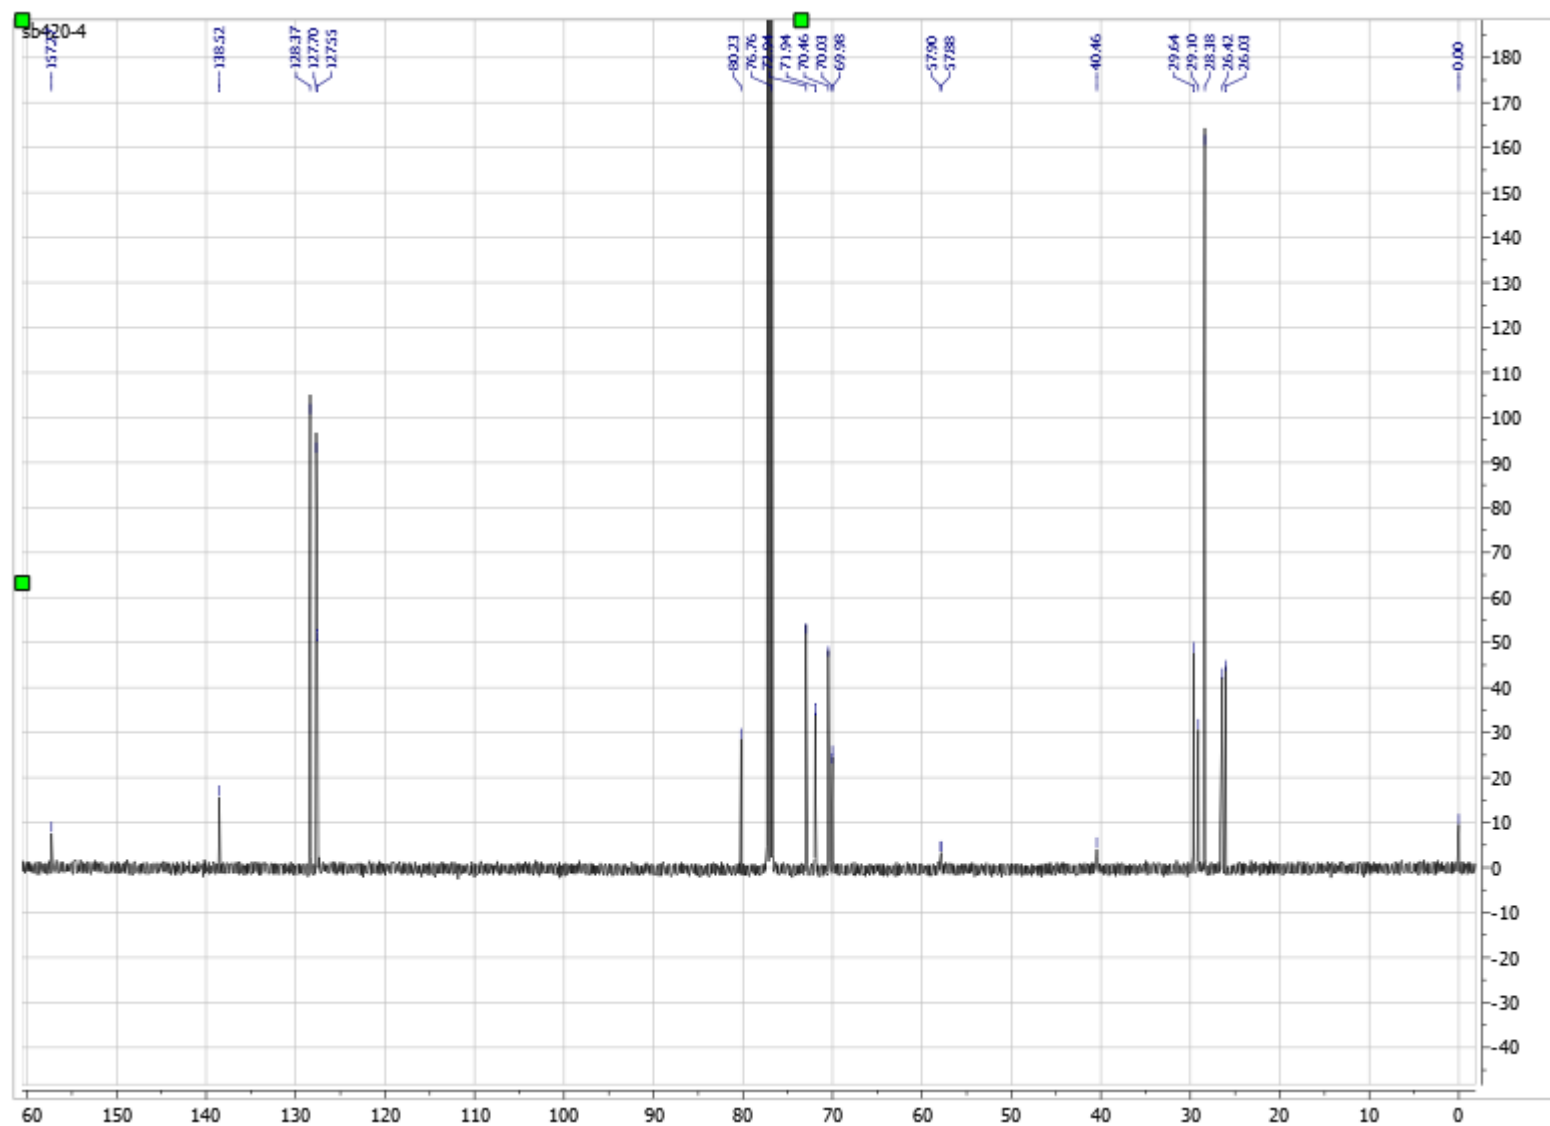

# **<sup>1</sup>H-NMR Compound 16**

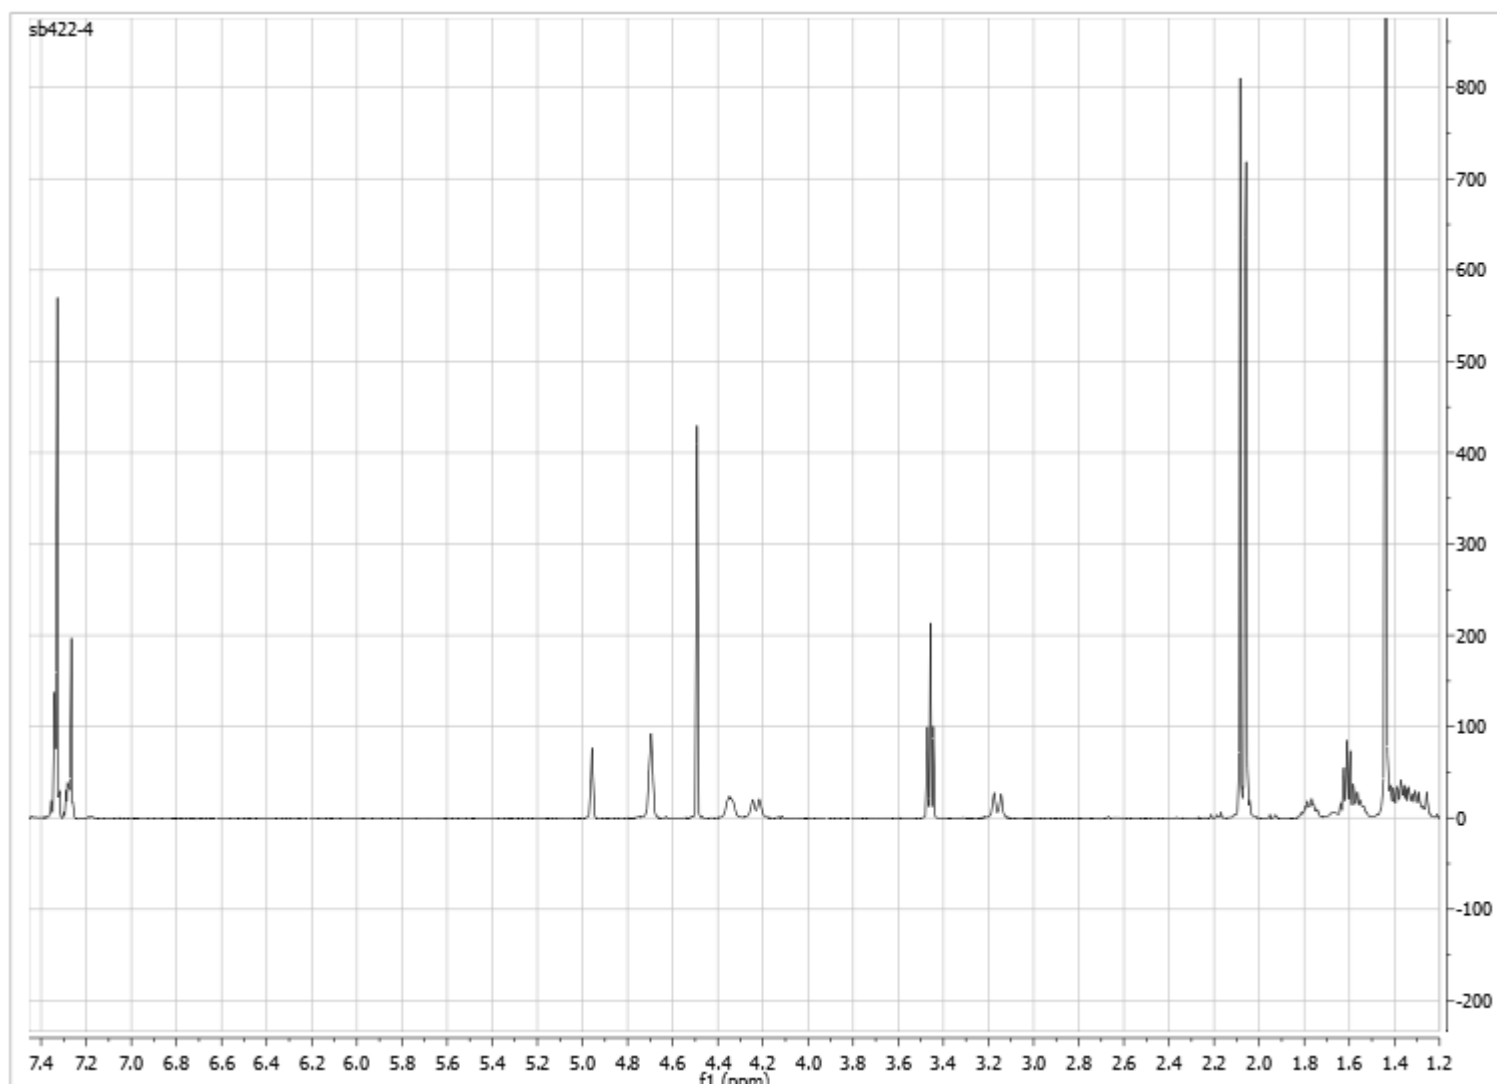

# **<sup>13</sup>C-NMR Compound 16**

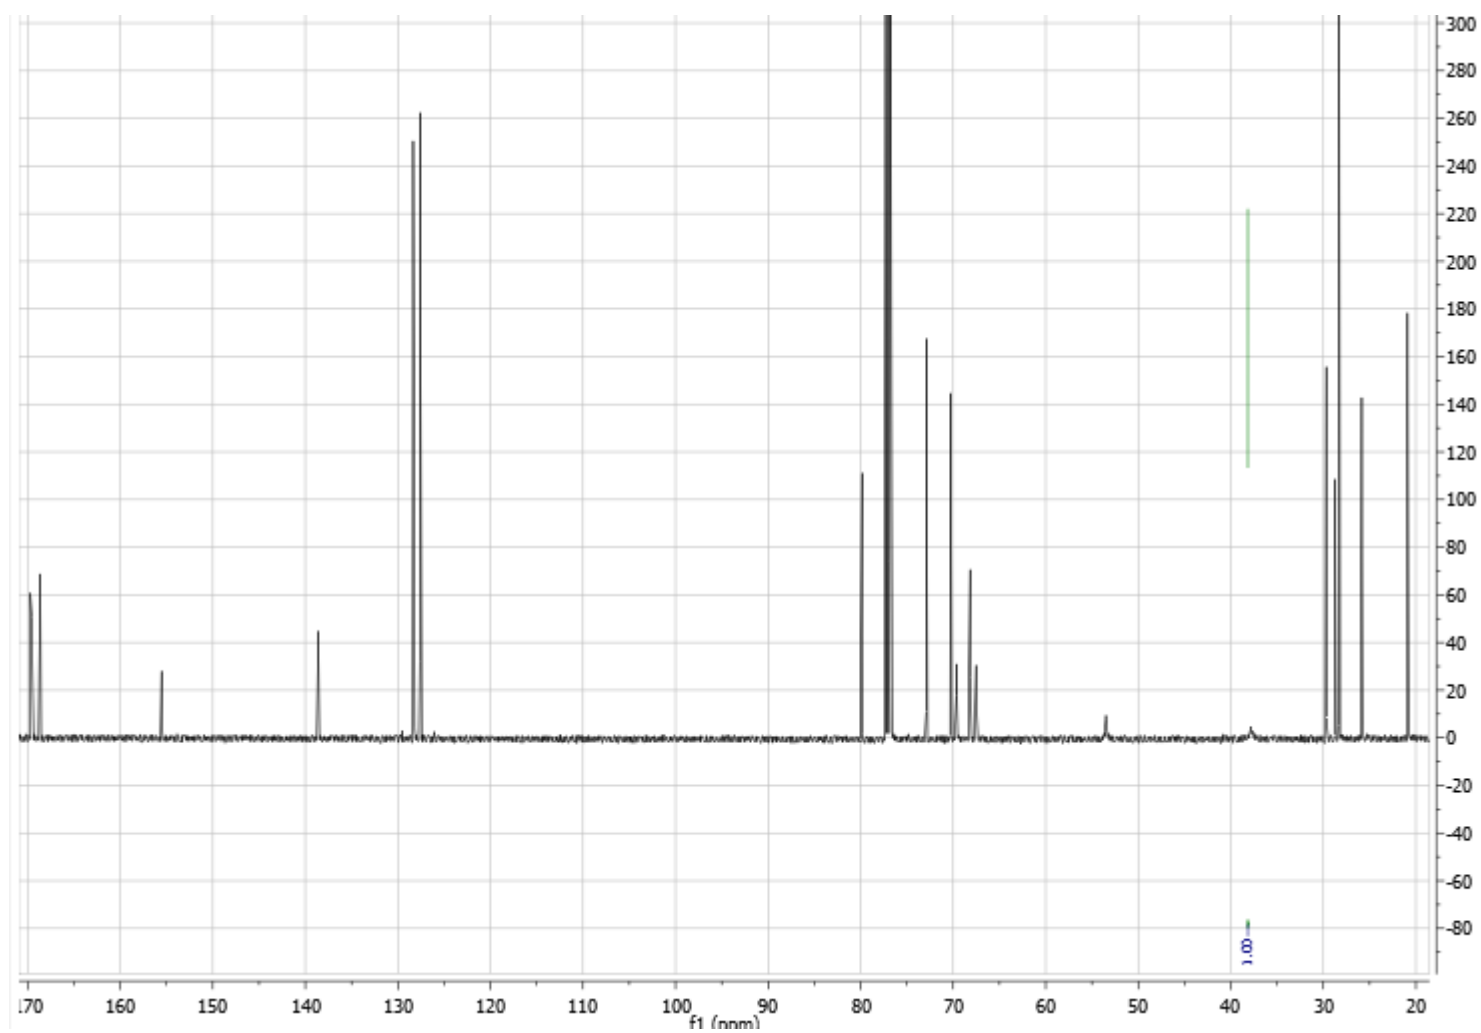

# **<sup>1</sup>H-NMR Compound 17**

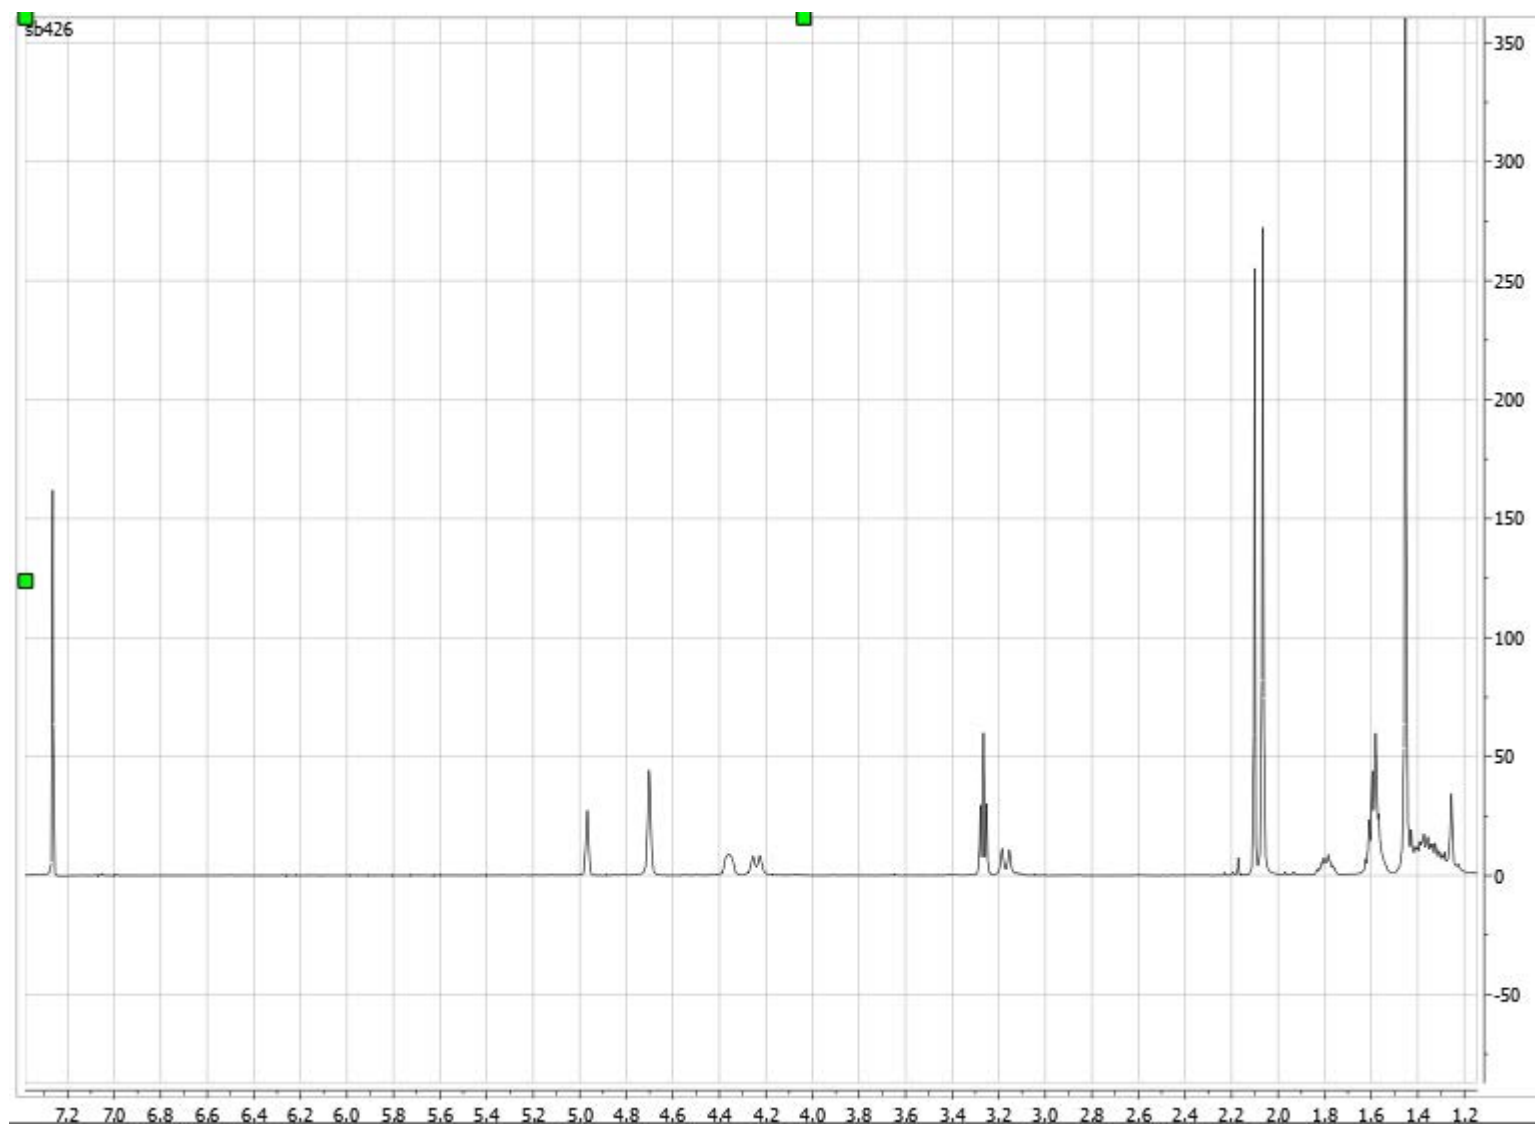

**<sup>13</sup>C-NMR Compound 17**

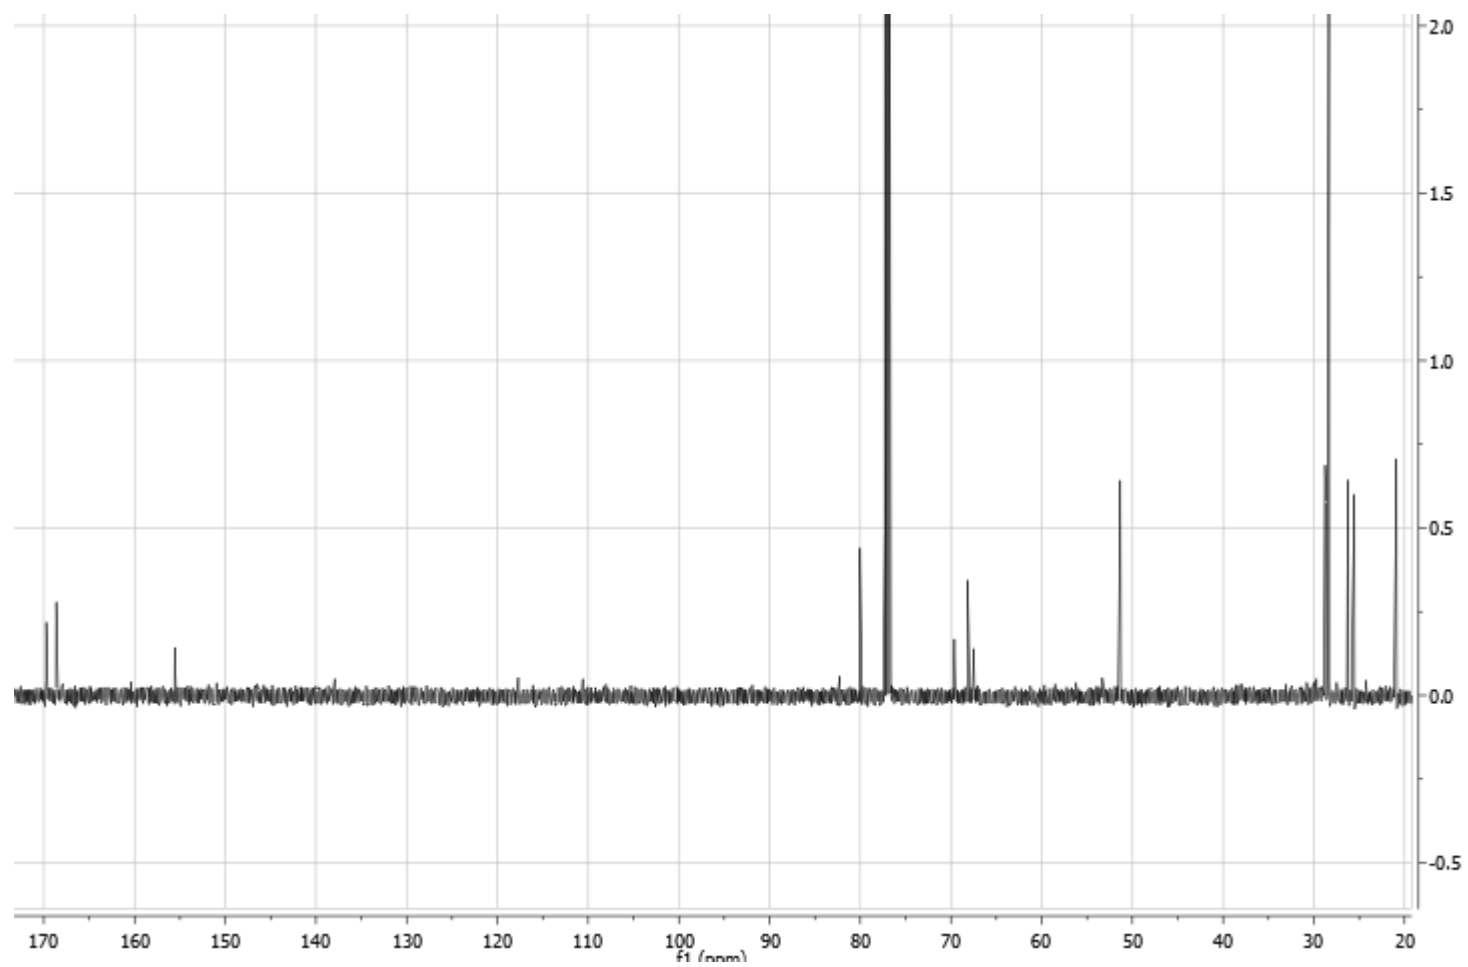

1H-NMR Compound 18

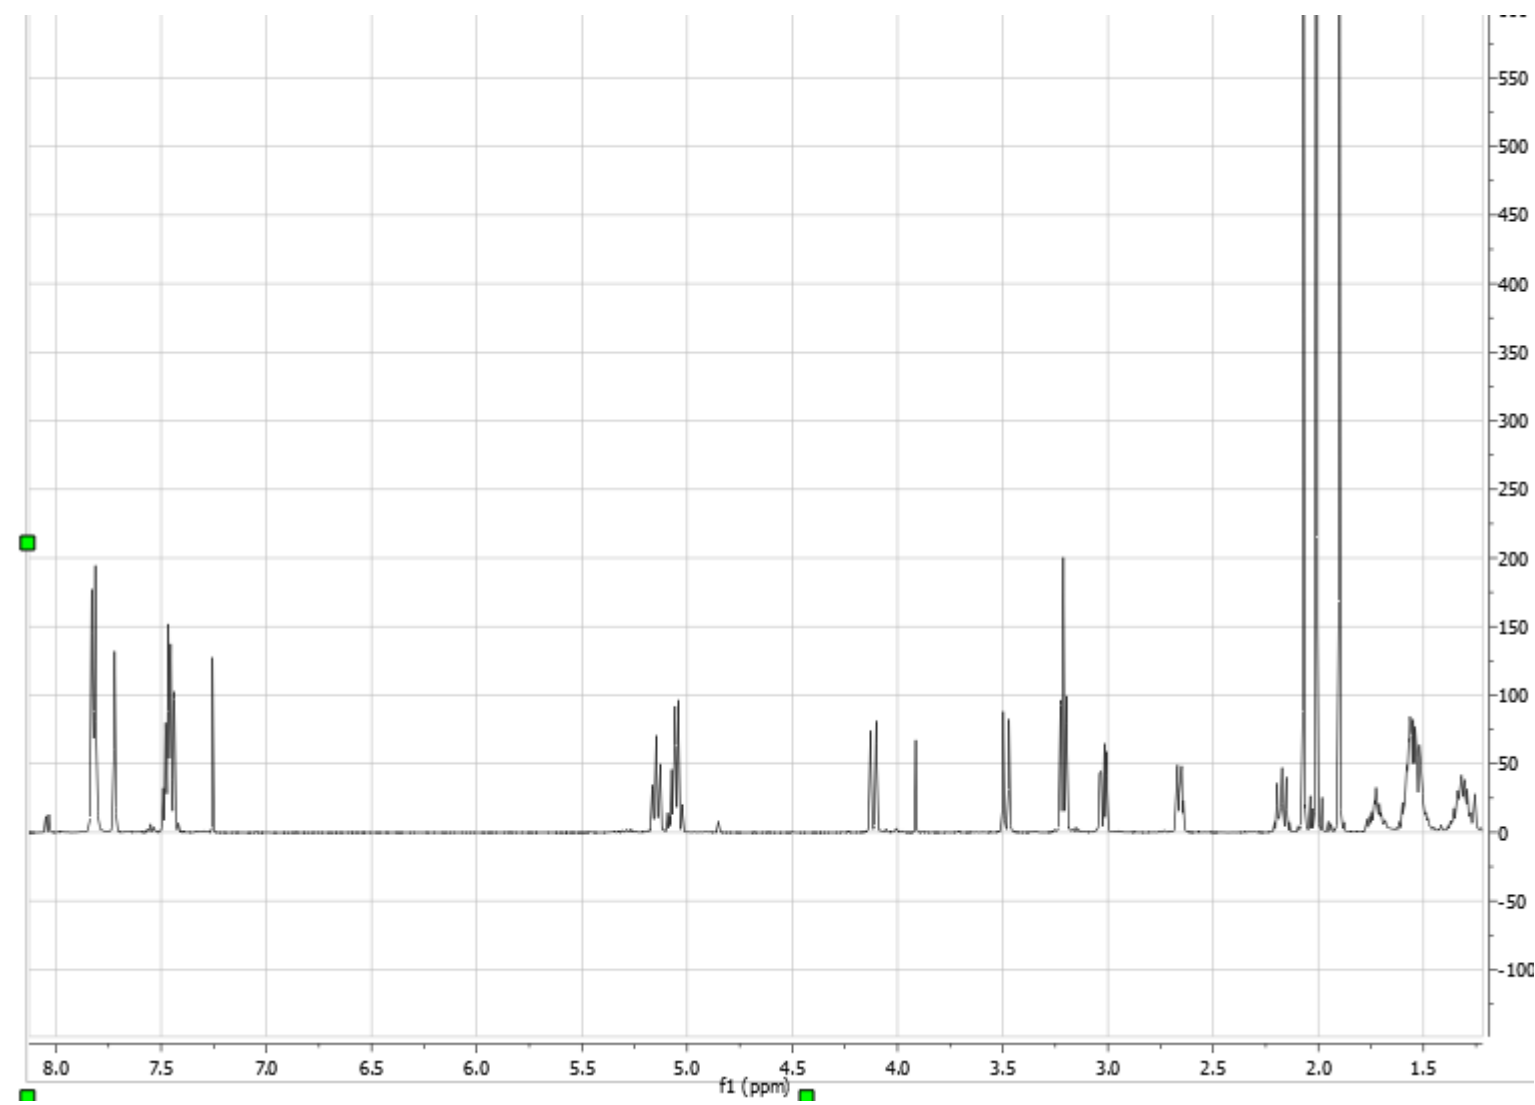

# **<sup>13</sup>C-NMR Compound 18**

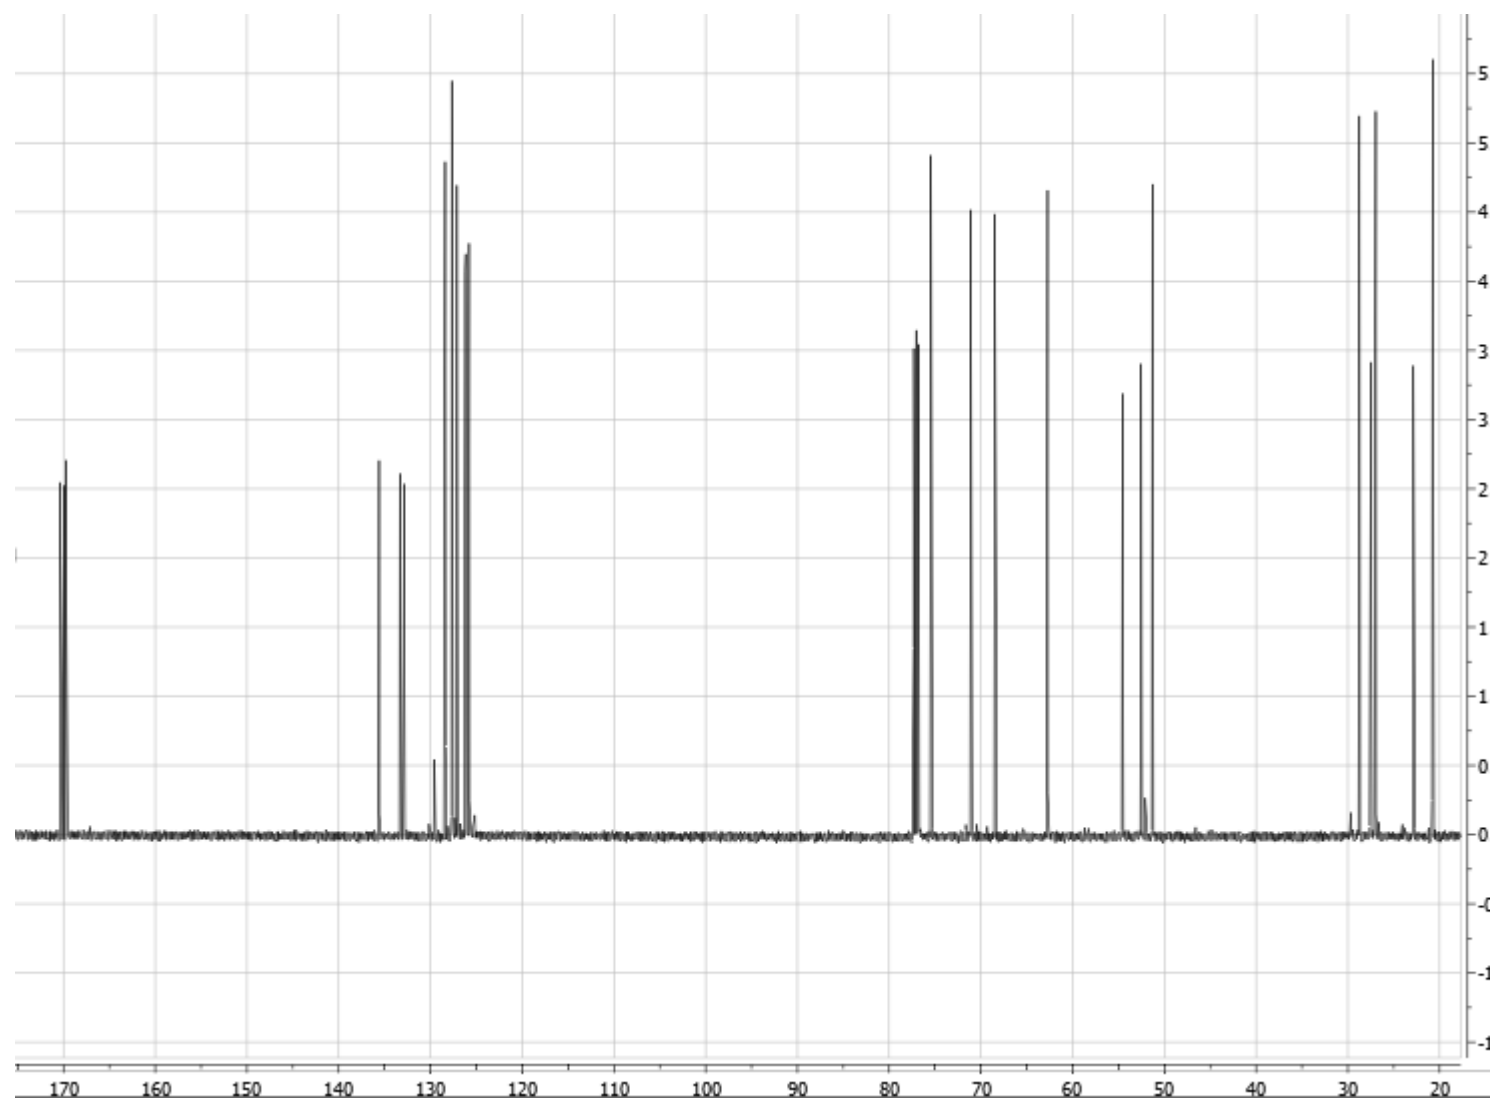

**<sup>1</sup>H-NMR Compound 19**

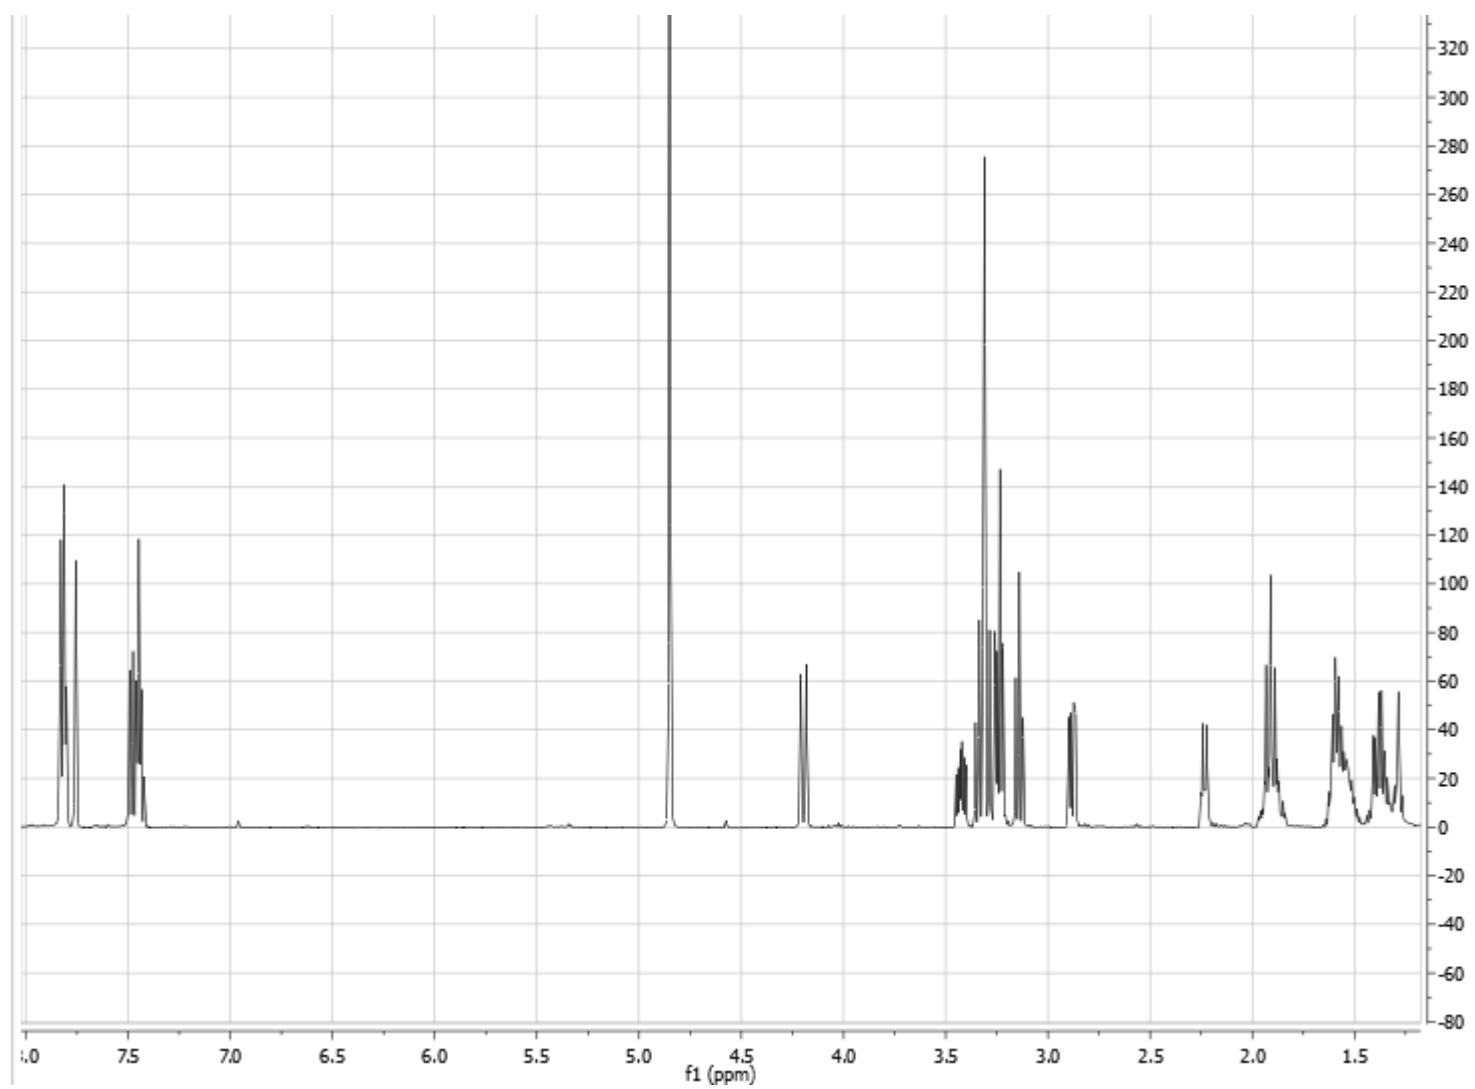



**<sup>13</sup>C-NMR Compound 19**

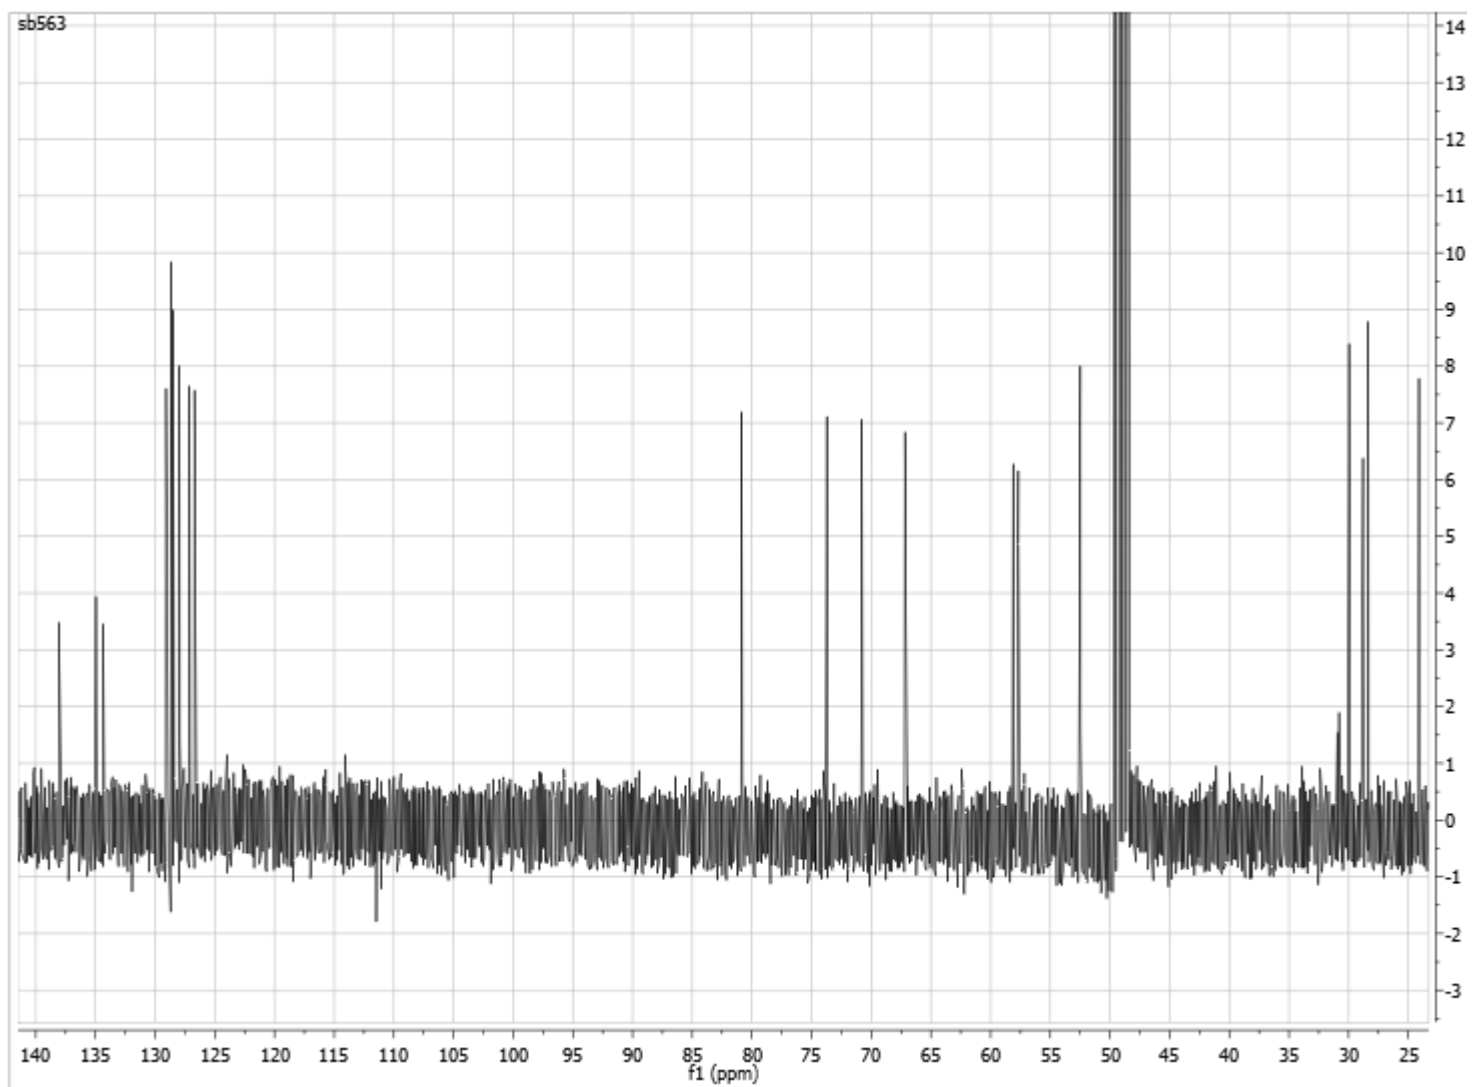

**<sup>1</sup>H-NMR Compound 6**

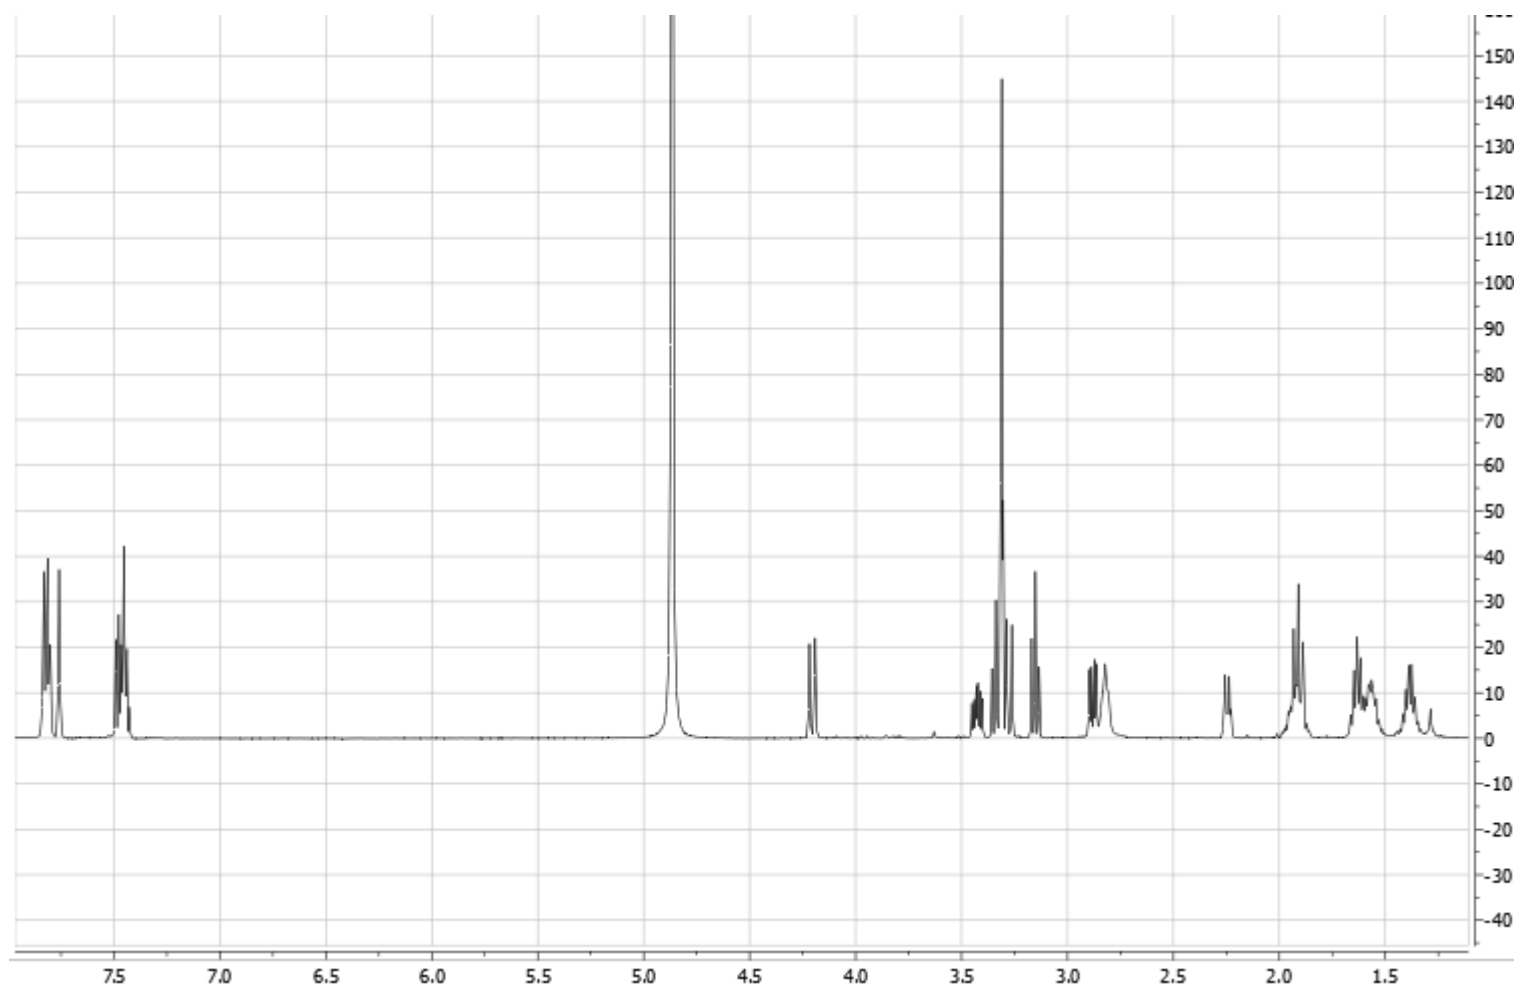

# **<sup>13</sup>C-NMR Compound 6**

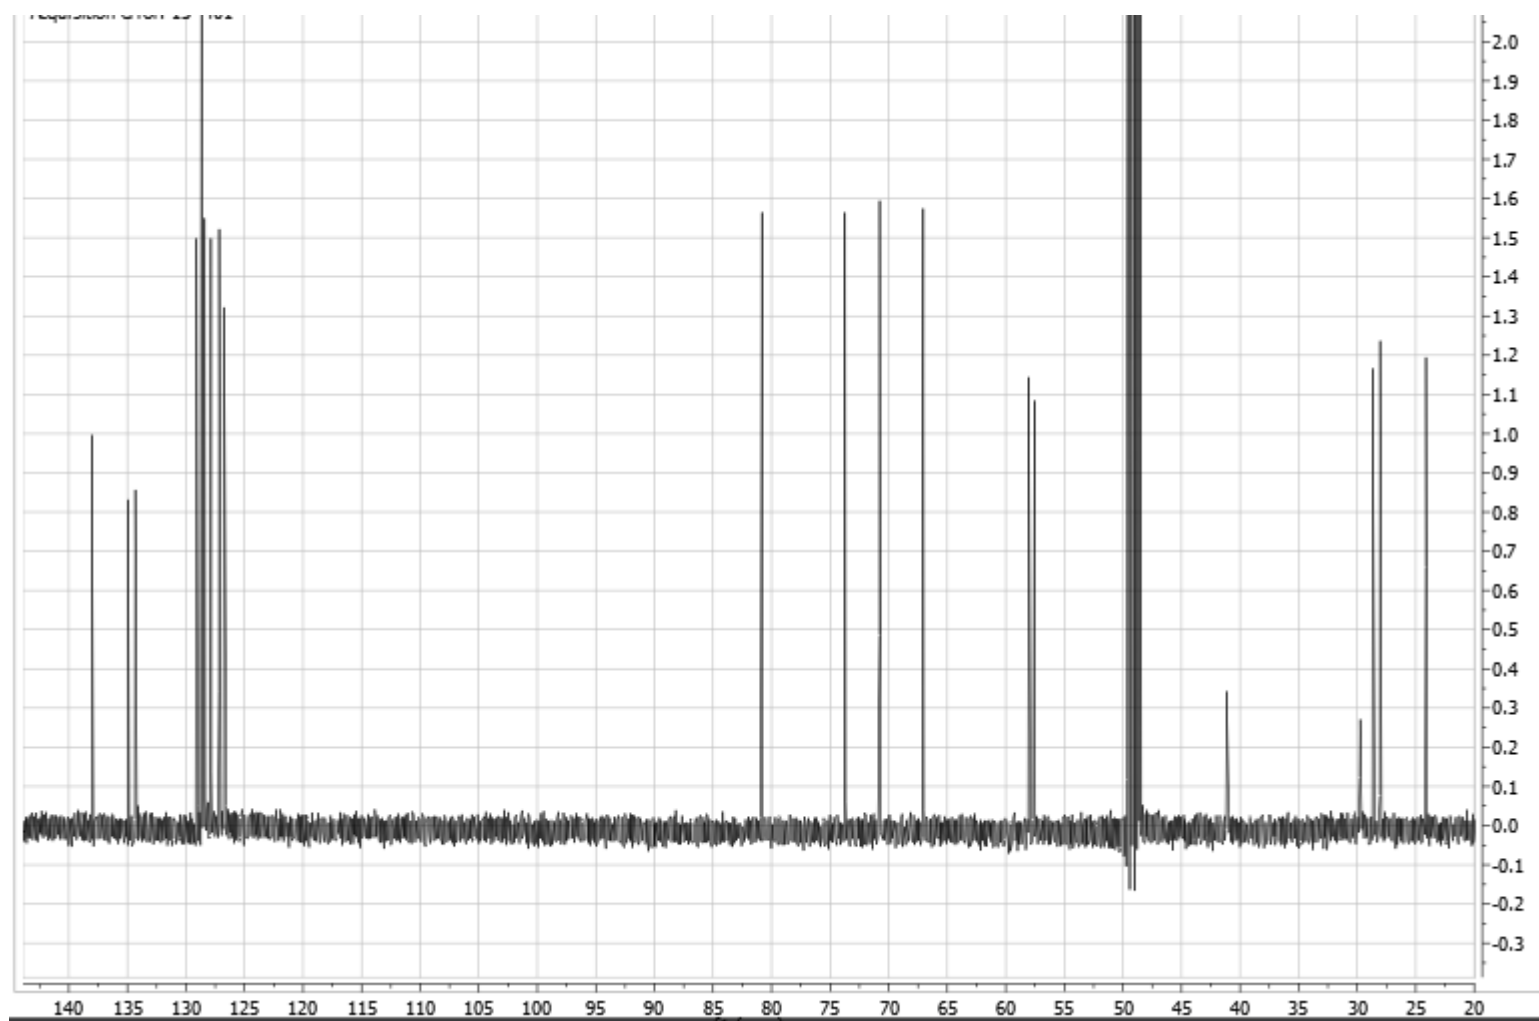

**<sup>1</sup>H-NMR Compound 7**

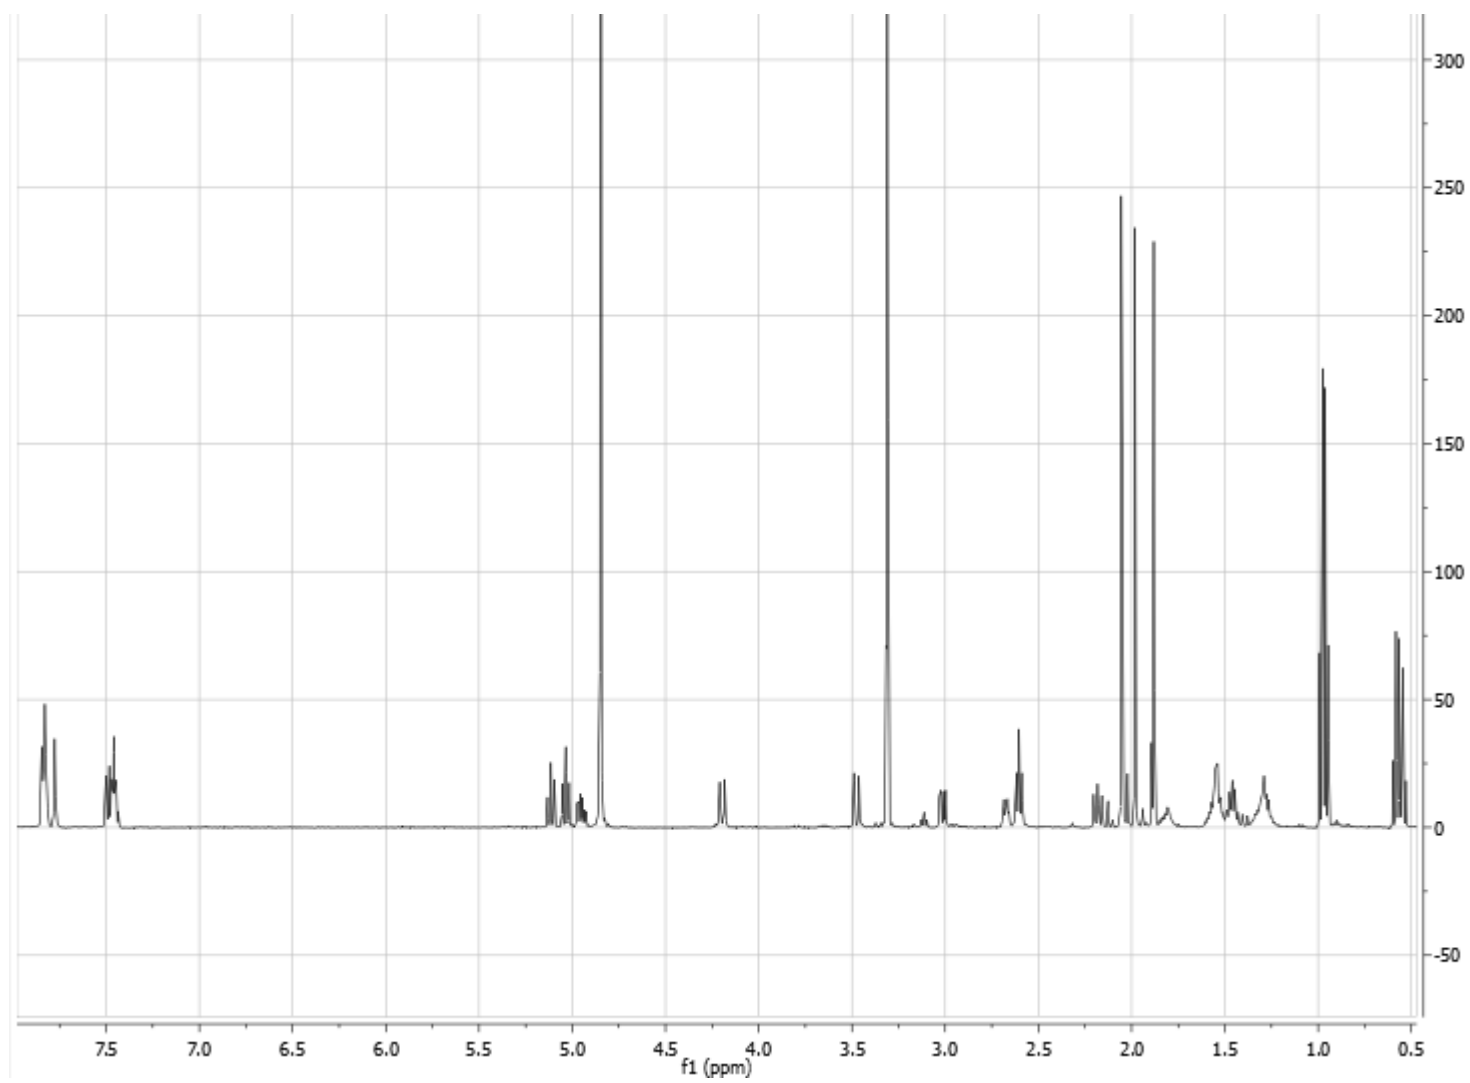

# **<sup>13</sup>C-NMR Compound 7**

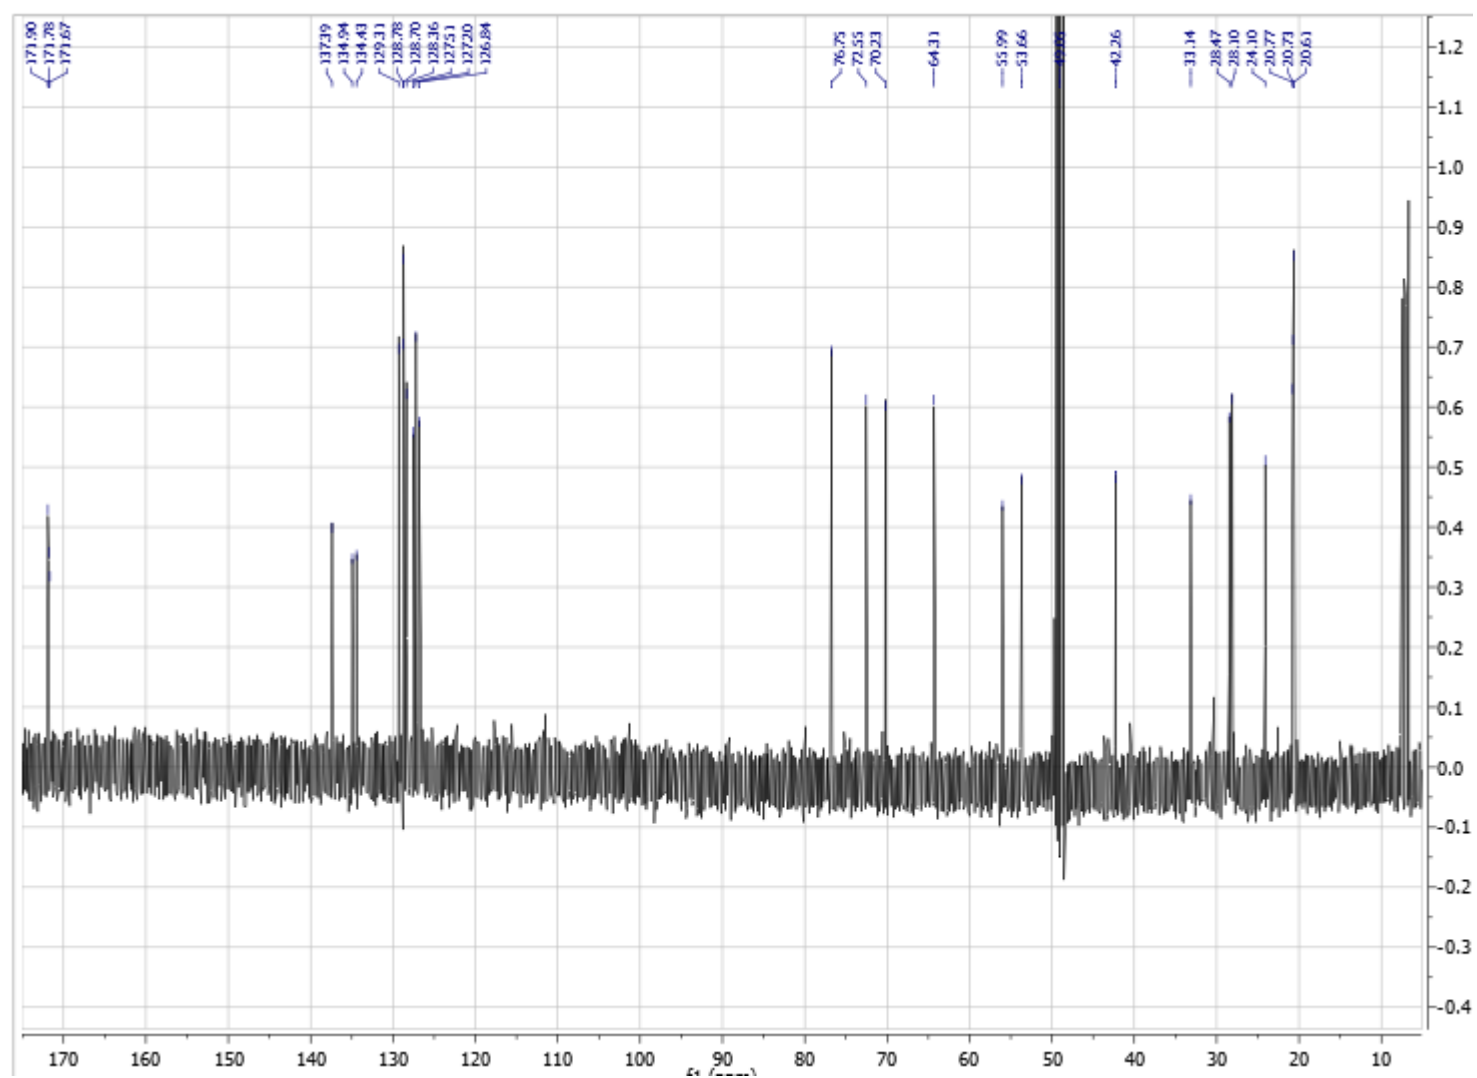

# **<sup>1</sup>H-NMR Compound 8**

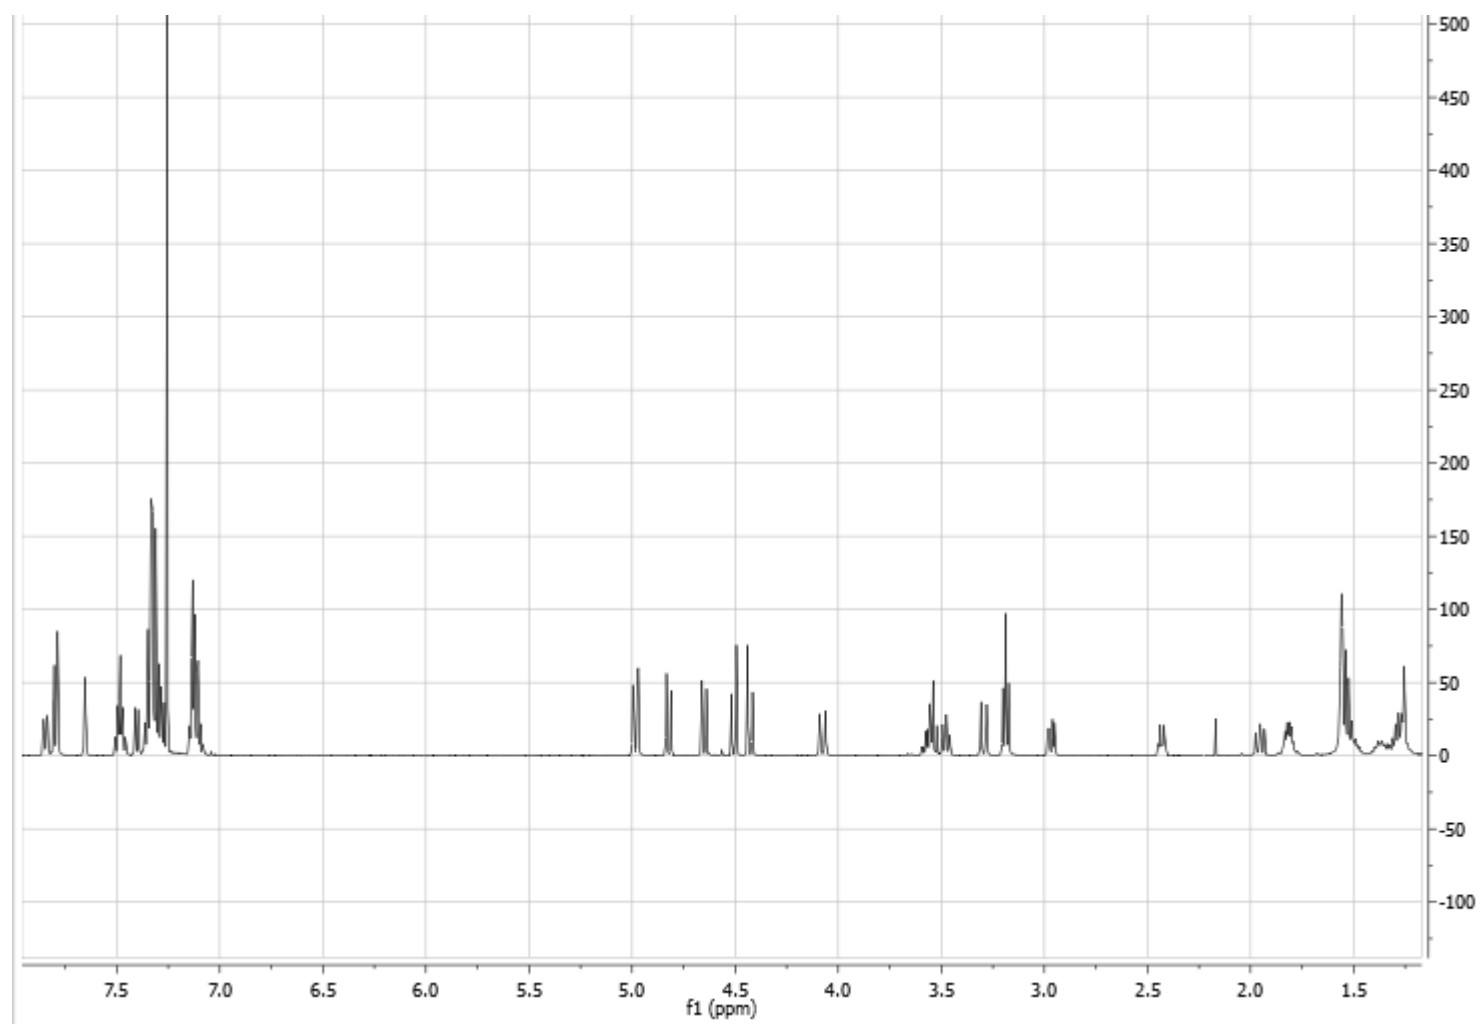

13C-NMR Compound 8

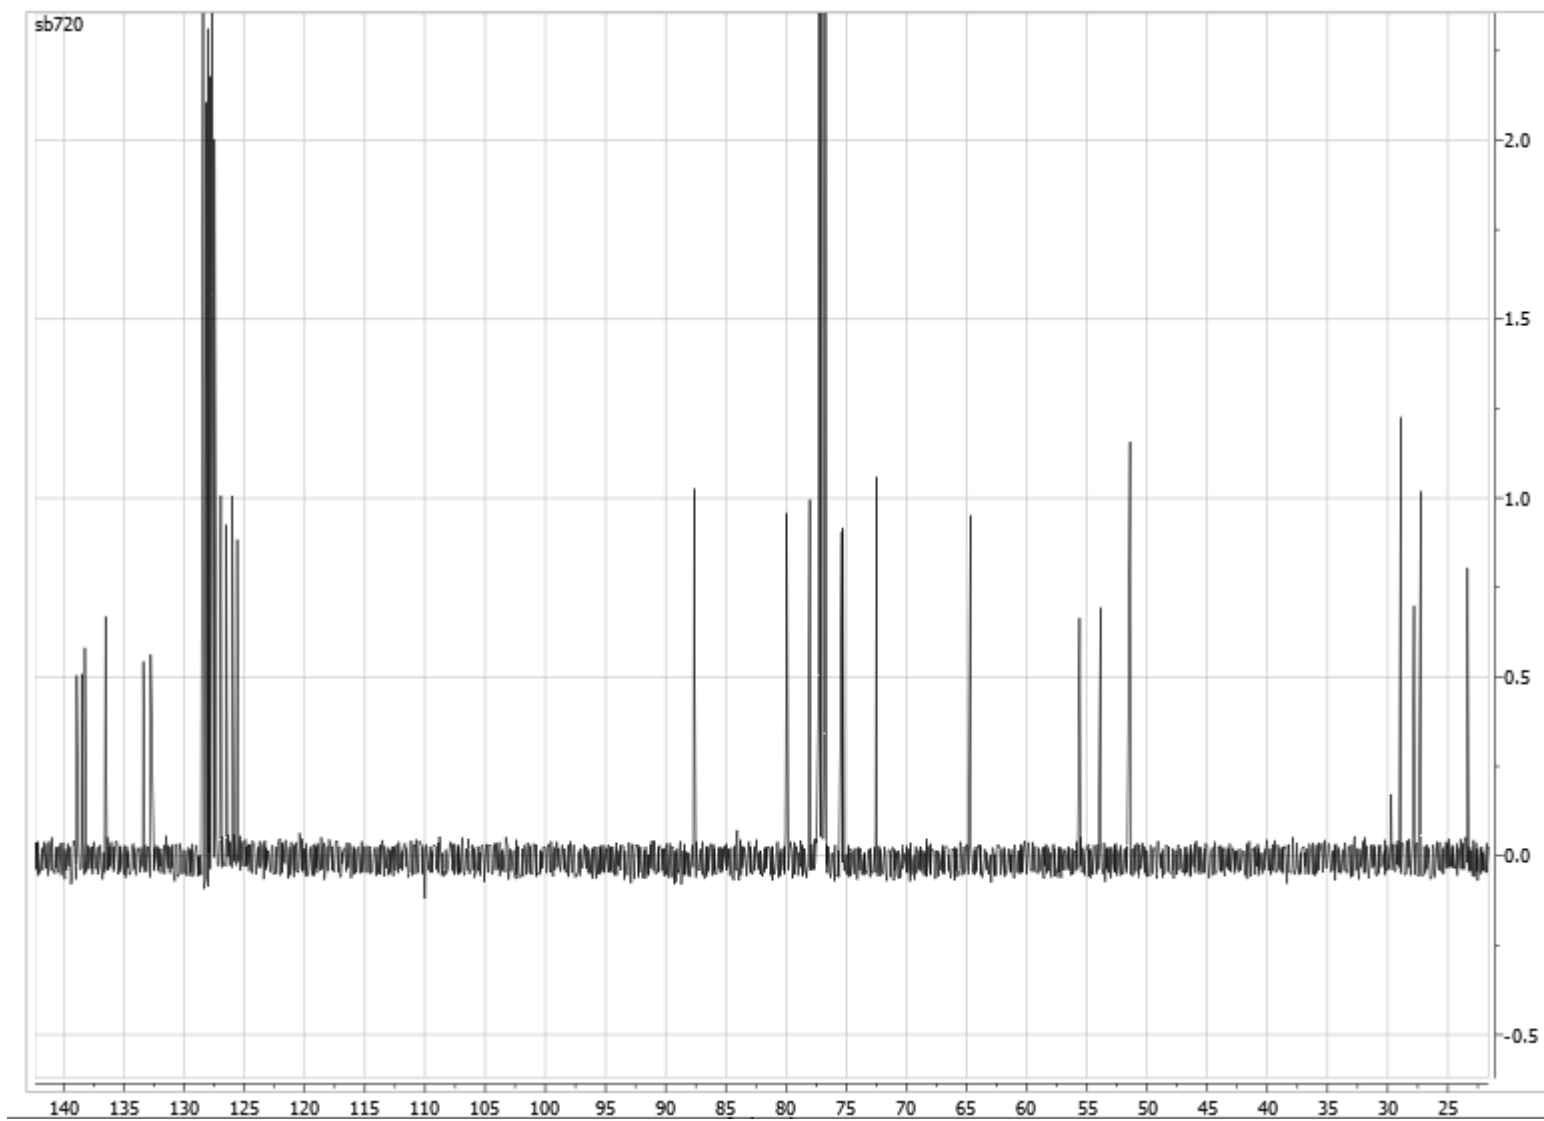

Log P was calculated using the physico-chemical property predictor function in Marvin ([www.chemaxon.com](http://www.chemaxon.com)). The preferences shown (default preferences) were used for the calculation.

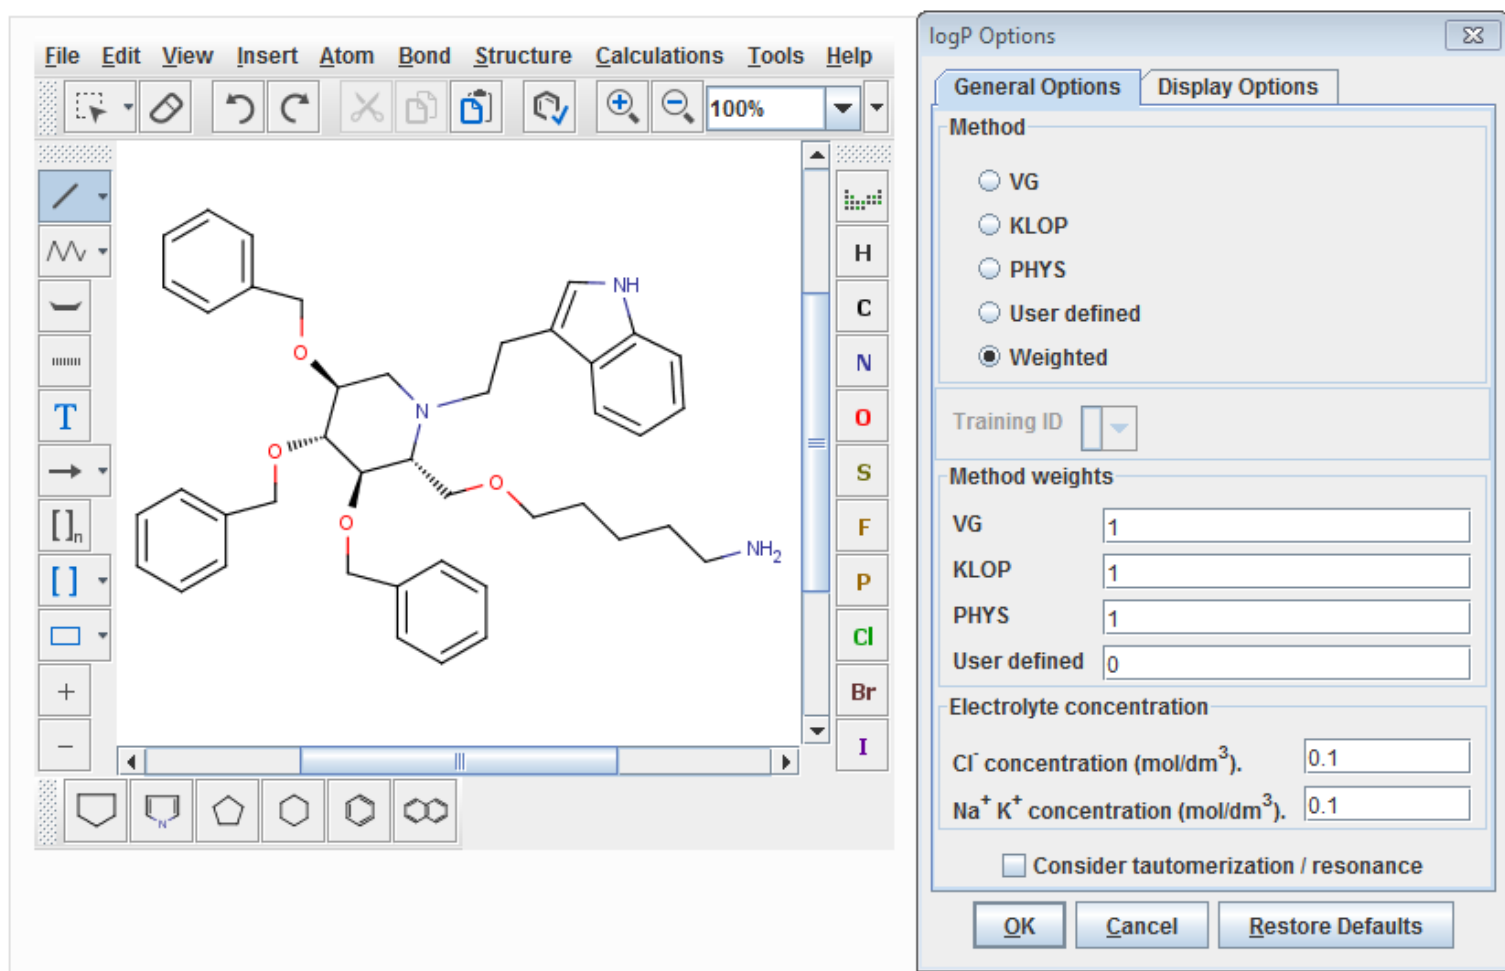

Supplement: c4md00074a6.pdf [file c4md00074a6.pdf]
